# **Occurrence and stability of hetero-hexamer associations formed by $\beta$ -carboxysome CcmK shell components**

Short title: Hetero-oligomerization of carboxysome shell components

Garcia-Alles Luis F.<sup>1,\*</sup>, Root Katharina<sup>2</sup>, Maveyraud Laurent<sup>3</sup>, Aubry Nathalie<sup>1</sup>, Lesniewska Eric<sup>4</sup>,  
Mourey Lionel<sup>3</sup>, Zenobi Renato<sup>2</sup>, Truan Gilles<sup>1</sup>

<sup>1</sup> TBI, Université de Toulouse, CNRS, INRA, INSA, Toulouse, France.

<sup>2</sup> Department of Chemistry and Applied Biosciences, ETH Zurich, Zurich, Switzerland.

<sup>3</sup> Institut de Pharmacologie et Biologie Structurale, IPBS, Université de Toulouse, CNRS,  
UPS, Toulouse, France.

<sup>4</sup> ICB UMR CNRS 6303, University of Bourgogne Franche-Comte, Dijon, France.

\* Corresponding author: [lgarciaa@insa-toulouse.fr](mailto:lgarciaa@insa-toulouse.fr) (LFGA)

## Abstract

The carboxysome is a bacterial micro-compartment (BMC) subtype that encapsulates enzymatic activities necessary for carbon fixation. Carboxysome shells are composed of a relatively complex cocktail of proteins, their precise number and identity being species dependent. Shell components can be classified in two structural families, the most abundant class associating as hexamers (BMC-H) that are supposed to be major players for regulating shell permeability. Up to recently, these proteins were proposed to associate as homo-oligomers. Genomic data, however, demonstrated the existence of paralogs coding for multiple shell subunits. Here, we studied cross-association compatibilities among BMC-H CcmK proteins of *Synechocystis sp.* PCC6803. Co-expression in *Escherichia coli* proved a consistent formation of hetero-hexamers combining CcmK1 and CcmK2 or, remarkably, CcmK3 and CcmK4 subunits. Unlike CcmK1/K2 hetero-hexamers, the stoichiometry of incorporation of CcmK3 in associations with CcmK4 was low. Cross-interactions implicating other combinations were weak, highlighting a structural segregation of the two groups that could relate to gene organization. Sequence analysis and structural models permitted to localize interactions that would favor formation of CcmK3/K4 hetero-hexamers. Attempts to crystallize these CcmK3/K4 associations conducted to the unambiguous elucidation of a CcmK4 homo-hexamer structure. Yet, subunit exchange could not be demonstrated *in vitro*. Biophysical measurements showed that hetero-hexamers are thermally less stable than homo-hexamers, and impeded in forming larger assemblies. These novel findings are discussed in frame with reported data to propose a functional scenario in which minor CcmK3/K4 incorporation in shells would introduce sufficient local disorder as to allow shell remodeling necessary to adapt rapidly to environmental changes.

## Introduction

Bacterial microcompartments (BMC) are protein-based organelles that encapsulate enzymes participating in a given metabolic route [1, 2]. An ever-increasing number of types of BMC that sustain varied catalyzed processes are being found in bacteria. Indeed, analysis of genomic data revealed that BMC likely form in a widespread manner across bacterial phyla [3]. BMC likely promote their specific

processes by concentrating the enzymes and substrates in a limited volume, and also by sequestering toxic or volatile reaction intermediates. These properties, their natural diversity, the possibility to reprogram BMC contents by means of targeting peptides [4-6], the modularity evidenced by the fact that bricks from different BMC could be assembled together [7, 8], as well as the possibility to reconstitute BMC in recombinant hosts by operon transfer [9-12], justify the strong interest for BMC as prototypes for engineering future nano-reactors for synthetic biology purposes.

An intense effort has been devoted to the structural characterization of BMC [1]. Information for individual components was largely obtained by means of X-ray crystallography. Thus, high resolution structures for several dozen shell subunits from different BMC types are now available. These data, combined with sequence information, confirmed that whilst differing in enzymatic contents, all BMC shells are built from homologous proteins adopting two structural folds. The first one (Pfam00936) is present in proteins that are organized as hexamers (BMC-H) [13-18], and as tandem domains in subunits that form trimers (BMC-T) [18-20]. These proteins often give rise within crystals to stacked two-dimensional (2D) layers, a property that was also confirmed by electron microscopy and atomic force microscopy [21-23]. Consequently, these proteins were proposed early to compose the planar facets of BMC shells, which according to various electron microscopy studies, could be polyhedral/icosahedral [24-26]. The second type of domain (Pfam03319) normally associates as pentamers (BMC-P) [18, 27, 28], although an hexamer was described as part of a structural genomics program [29]. BMC-P were speculated to occupy pentagonal vertices of icosahedral shells. Overall, these basic principles were confirmed recently by the 3.5-Å resolution 3D structure of the first full BMC [30]. This impressive work also demonstrated the structural plasticity for shell components. Thus, two different hexamer-hexamer interactions, planar or 30°-tilted, were established in the single BMC-H subunit from *Haliangium ochraceum*, giving credit to the physiological meaning of non-planar assemblies described for BMC-H [23, 31, 32].

High-resolution structural investigations of shell components have been invariably performed on single protein paralogs, which associate as homo-oligomers. However, it is now well established that variable number of genes coding for homologous BMC-H, BMC-T or BMC-P subunits are present in every BMC-carrying organism. Kerfeld and colleagues demonstrated that each genome contains, on

average, 3.5 BMC-H genes, 1.4 BMC-T genes, and 1.2 BMC-P genes, with extreme cases having up to 15 BMC-H, 5 BMC-T or 7 BMC-P copies [3]. Moreover, several paralogs are often integrated within the same operon, and therefore are likely expressed simultaneously. It is therefore necessary to ascertain whether hetero-oligomers might form or not, since subunit properties such as pore size, pore and surface electrostatics, oligomer symmetry, or even assembly behavior might be considerably altered, when compared to homo-oligomers.

Here, we investigated this possibility by selecting the four CcmK paralogs that compose the shells of carboxysomes from the *Synechocystis sp.* PCC 6803 cyanobacteria (*Syn6803*). In this microorganism, *ccmK1* and *ccmK2* genes (coding for BMC-H paralogs) are encoded in an operon that also contains *ccmL* (BMC-P) and genes for other compartment components, whereas *ccmK3* and *ccmK4* cluster together in a different locus (a schematic representation of gene organization is presented in reference [33]). CcmK capacity to associate within hexamers was inspected here by co-expressing protein couples in *E. coli*, and under configurations permitting simultaneous production of the four paralogs. Experimental compatibilities between CcmK1 and CcmK2, as well as between CcmK3 and CcmK4 paralogs could be demonstrated. The formation of hetero-hexamers between CcmK3 and CcmK4 from *Synechococcus elongatus* PCC7942 (*Syn7942*) could be shown too, thus confirming and complementing results obtained on the same proteins and on paralogs from *Halotheca* PCC 7418 (*Hal7418*) [34]. Such observations were reasoned on the basis of sequence identities and compensatory effects for residues implicated in inter-subunit contacts, also by means of dynamic simulations using homology models. The stability of purified hetero-associations was finally investigated by biophysical means and in subunit exchange experiments. Overall, our data together with recent findings strongly suggest that the formation of such hetero-oligomers is likely to occur in cyanobacteria. Although adding to the complexity of BMC shells, this phenomenon might play important roles in modifying the structural robustness and environmental adaptability of BMC shells.

## Results

### Selection of engineered *Syn6803* CcmK constructs

Prior to studying the compatibility between the different *Syn6803* CcmK components, we established the expression and solubility profiles of untagged proteins in *E. coli*. Collected data proved good expression of all 4 paralogs. Abundant soluble material was present after lysis in all cases, exception made of CcmK3 (abbreviated K3, Fig. S1).

The impact of tagging was also examined. Short peptides were selected and placed at either the N- or C-terminus. Overall, C-ter tagging was better tolerated, permitting the production of soluble CcmK1 (K1) and CcmK2 (K2) with any of the 4 peptides (Fig. S2). Multiple bands observed for CcmK4 (K4) pointed to proteolysis phenomena. At the N-terminus, expression was restricted to His<sub>4</sub> and FLAG constructs, and only K2 and K4 remained soluble. Once again, no band corresponding to soluble K3 could be detected, irrespective of peptide type and tagging side.

### Hetero-hexamer formation between *Syn6803* CcmK paralogs

To investigate the potential association of paralogs within hexamers, all possible couples of genes coding for CcmK proteins were engineered in a pET26b-based plasmid that included two cassettes for independent expression (each one presenting T7 promoter/lac operator, RBS and T7 terminator) (Fig. S3A). Combinations of His<sub>4</sub>-tagged CcmK and a second FLAG-tagged CcmK were assayed in *E. coli*, following standard IPTG induction protocols. Bearing in mind results from previous section, plasmids coding for C-ter tagged K1, K2 and K4 were favored. Combinations with N-ter His<sub>4</sub>-tagged K4 were also treated to anticipate the possibility that purified yields with the C-ter tagged K4 were low due to mentioned proteolytic instability of this construct. Finally, N- or C-ter FLAG-tagged and untagged K3 were also studied, in view of the demonstrated insolubility of the K3 paralog.

Cell contents, proteins remaining soluble after lysis and centrifugation, and purified fractions recovered on TALON resins were analyzed on Coomassie-stained SDS-PAGE gels (Fig S3B). Bands indicative of the occurrence of species with slightly different apparent size permitted to directly infer co-purification of K1 and K2, irrespective of which of the two was carrying the His<sub>4</sub> or FLAG tag. Double bands were also noticed when K4 labeled at the C-ter with His<sub>4</sub> and FLAG were expressed

together. Absence of proteins was noticed in purified fractions for combinations with K3. This was the case for all 5 combinations with K3-His<sub>4</sub> (3<sup>rd</sup> lane, Fig. S3). More surprising, purified proteins were also absent for combinations between K1-His<sub>4</sub> and FLAG-tagged or untagged K3 (white arrows). Despite less affected, K2-His<sub>4</sub> and K4-His<sub>4</sub> levels also diminished when co-expressed with K3, as compared to material purified in combination with other CcmK paralogs. The most intense bands in combinations with K3 were those of His<sub>4</sub>-K4 (5<sup>th</sup> lane, Fig. S3).

The presence of FLAG-tagged partners in purified samples was next verified by western blot (WB, Fig. 1). Combinations between His<sub>4</sub>- and FLAG-tagged of the same paralog served as positive controls, providing an indication of signal level attained for homo-hexamers. Such bands were not for K1, K2 and K4 cases. Not surprisingly, signals were absent in combinations between His<sub>4</sub>- and N- or C-ter FLAG-tagged K3 constructs, which also failed to reveal any purified material in Coomassie-stained gels (Fig. S3).

Signals revelatory of hetero-hexamer formation were intense for combinations between K1 and K2 (1<sup>st</sup> and 2<sup>nd</sup> lanes and columns in Fig. 1), irrespective of which of the two carried the His<sub>4</sub> or FLAG peptide. Signals were comparable to those obtained for positive controls (K1 or K2 homo-hexamers). The most remarkable observation was, however, the detection of an intense band when His<sub>4</sub>-K4 was combined with K3-FLAG. The intensity was, however, weaker than that observed for the K4 homo-hexamers. Some degree of cross-association was noticed between His<sub>4</sub>-K4 and the FLAG-K3 construct, but also with FLAG-tagged K1 and K2, the latter being confirmed by a moderate intensity band with K4-His<sub>4</sub>.

## **Hetero-hexamer formation confirmed by native MS**

BMC-H proteins are prone to assemble into large patches, observed *in vitro* but also during recombinant expression inside cells. Therefore, data presented in the previous section might be explained as being the consequence of the purification of mixed assemblies combining different homo-hexamers. To clarify this possibility, three type of experiments were carried out. First, purified fractions that according to WB data contained hetero-hexamers (i.e. combinations between K1 and K2, or between His<sub>4</sub>-K4 and K3) were analyzed by size-exclusion chromatography (SEC). The His<sub>4</sub>-K4/K3-FLAG sample eluted at volumes characteristic of homo-hexamers, whereas K1-His<sub>4</sub>/K2-FLAG showed

intermediate behavior between hexamers and dodecamers. This elution behavior was observed only for *Syn6803* K2 homo-hexamers, and is assumed to arise from formation of dodecamers consisting of stacked hexamers [15, 35]. Second, cells expressing separately each homo-hexamer (His<sub>4</sub>- or FLAG-tagged) were mixed up before lysis and purification. Fractions recovered from TALON resins did not reveal bands of FLAG-tagged proteins in WB. These experiments ruled out the copurification of assembled homo-hexamers, also the occurrence of monomer exchange between homo-hexamers during manipulations.

Finally, samples were inspected by native electrospray ionization mass spectrometry (native ESI-MS), an approach that is well suited for the characterization of molecular associations present in solution. This technique was exploited in a previous study to characterize His<sub>4</sub>-tagged CcmK homo-hexamers [23]. After improving the molecular homogeneity of TALON-purified fractions by TEV treatment, hetero-hexamers could be detected in the 3500-5000 m/z range by native ESI-MS (Fig. 2). For K1-His<sub>4</sub>/K2-FLAG, the presence of the K2 paralog was directly evidenced by its two typical charge state distributions (CSD) at m/z 4000-5000 and 5500-6200 m/z. The second CSD, however, corresponded to species of lower MW than those detected before for the K2 homo-hexamer [23]. A zoomed view of the hexamer distribution indicated that every charge state was in fact split into several signals, matching to hexamers of different stoichiometries (shown in the inset of Fig. 2A). After averaging over all charges, the calculated MW matched to K1/K2 stoichiometries ranging from 1:5 to 4:2 (Table S1). Deviations from values calculated for combinations of monomers were small, below 50 Da. Such monomers were seen in the 1000-2000 m/z range, with masses indicative of loss of the first methionine, something usual for C-ter tagged proteins. Definitely proving the occurrence of hetero-hexamers, the two CcmK monomers were produced when given hexamer species were subjected to collision induced dissociation (CID) (Fig. 2A, bottom panel). In addition, no evidence from K2-derived species could be obtained when similar experiments were performed on material purified from pools of cells expressing K1-His<sub>4</sub> and K2-FLAG separately (Table S1).

Analogous conclusions were drawn from data collected on complexes formed between His<sub>4</sub>-K4 and K3-FLAG (Fig. 2B). The most important evidence was the detection of the two monomers dissociating from selected hexamer species submitted to CID. Monomer masses were in excellent agreement with

the expected value for TEV-untagged His<sub>4</sub>-K4 and K3-FLAG (after loss of first methionine with the latter). The attribution of hexamer peaks in the 3500-5000 m/z region to different stoichiometries was less straightforward than for K1/K2 complexes, a likely consequence of the small MW difference between the two monomers (113 Da, or 244 Da if K3 had lost the first Met). The most intense signal best matched a K3/K4 hetero-hexamer with 1:5 stoichiometry. K4 homo-hexamers were also detected, something that contrasts with data for K1/K2 that only revealed hetero-hexamers. It is also worth mentioning that faint signals were detected for a 71.1 kDa species. This MW closely matches a hypothetical K3 hexamer, which should however not be retained by the TALON resin. Alternatively, they could derive from homo- or hetero-hexamers composed of partially degraded CcmK subunits. Two other minor species, of approx. 37.7 and 66.8 kDa, could not be attributed to any n-mer combination.

## **Simultaneous expression of all CcmK paralogs**

Co-expression of CcmK couples proved the structural compatibility between CcmK1 and CcmK2 or between CcmK3 and CcmK4 couples. This coincidentally reflects the organization of each CcmK couple at separated chromosomal loci, and might therefore support an independent evolution of each CcmK pair of sequences. Our data, however, did not rule out the possibility of attaining more complex associations in situations of concomitant expression of all four paralogs. Transcriptomic data indicate that all four CcmK paralogs might be expressed simultaneously in *Syn6803*, depending on environmental conditions [36]. Besides, weak WB signals noticed for combinations between K4 and FLAG-tagged K1 and K2 (Fig. 1) suggested that other combinations might lead to more complex associations.

A similar strategy as presented above was adopted to investigate this point, the main difference being that engineered plasmids included four cassettes permitting independent expression of proteins tagged with different short peptides: His<sub>4</sub>, StrepTag, FLAG and HA at cassettes 1, 2, 3 and 4, respectively. We limited our screening to eight combinations (schematized in Fig. S4A). These included His<sub>4</sub> C-ter tagged K1, K3 and K4, as well as N-ter tagged His<sub>4</sub>-K4 for reasons mentioned above (all in cassette 1). Depending on the identity of the paralog at first cassette, N- or C-ter FLAG tagged K3 or K4 were placed at cassette 3, and either K1-HA or K4-HA at cassette 4. All cases included K2-StrepTag at cassette 2. Additionally, a positive control was assayed that consisted of K2-His<sub>4</sub> combined with K2 labeled with



all three other peptides at cassettes 2 to 4, and which should inform on signal thresholds attained with identical configurations leading to homo-hexamers.

The co-expression of the different combinations was screened in *BL21(DE3)* cells after classical induction with IPTG or under auto-induction conditions. Six of the eight screened plasmids resulted in sufficient purified protein as to be visualized in Coomassie-stained SDS-PAGE gels. Most intense bands were those obtained with the two plasmids combining His<sub>4</sub>-K4/K2-Strep/FLAG-K3/K1-HA and His<sub>4</sub>-K4/K2-Strep/K3-FLAG/K1-HA (Fig. S4B-4), which revealed bands irrespective of the choice of induction system. Moderate intensity bands were produced with the K3-His<sub>4</sub>/K2-Strep/FLAG-K4/K1-HA case (Fig. S4B-2-left). Bands were faint but more clearly detected under auto-induction conditions with K1-His<sub>4</sub>/K2-Strep/K3-FLAG/K4-HA (Fig. S4B-1-right), K3-His<sub>4</sub>/K2-Strep/K4-FLAG/K1-HA (Fig. S4B-2-right) and K4-His<sub>4</sub>/K2-Strep/K3-FLAG/K1-HA (Fig. S4B-3-right). Most unexpected were bands recovered in combinations with K3-His<sub>4</sub>, since this construct is normally insoluble and reluctant to purification, as shown in previous experiments (Fig. S1&S2). Moreover, the major band for K3-His<sub>4</sub>/K2-Strep/FLAG-K4/K1-HA corresponded to the FLAG-K4 partner, indicating a low incorporation of the K3-His<sub>4</sub> within purified hexamers, in good agreement with the stoichiometries identified by native ESI-MS (see above). None or very faint bands were revealed for the two combinations implying the K1-His<sub>4</sub> partner (Fig. S4B-1), which is otherwise well soluble and purified in good amounts when expressed alone (Fig. S2). We hypothesized that this could be due to interferences caused by K3, as indicate results collected in studies of co-expression of K1/K3 couples (Fig. S2).

Inspection by WB permitted to identify K3/K4 and K1/K2 as being the dominant associations. Thus, FLAG signals were intense for combinations implying His<sub>4</sub>-K4 and K3-FLAG and for K3-His<sub>4</sub> with FLAG-K4 (Fig. 3, see also Fig. S4C). Less intense associations were revealed for K3/K4 combinations with tags on the same side. The only signal corresponding to StrepTag or HA in purified fractions was revealed for the combination K1-His<sub>4</sub>/K2-Strep/K3-FLAG/K4-HA. The low signal level, which again supported a K1/K2 interaction, can be explained by the low amount of purified protein. Validating our approach, intense signals from StrepTag, FLAG and HA peptides were detected for the purified homo-hexamer control deriving from co-expression of K2-His<sub>4</sub>/K2-Strep/K2-FLAG/K2-HA (Fig. 3, last column).

## Sequence-structural considerations for the formation of CcmK3 homo-hexamers or CcmK3/K4 hetero-hexamers

Despite well expressed, the low solubility of *Syn6803* K3 precluded the investigation of its solution behavior or attempts to elucidate its crystal structure. To understand whether this behavior could be linked to an incorrect folding of the K3 monomer or to the presence of residues incompatible with oligomerization, the amino acid sequence was first aligned with those of other *Syn6803* paralogs or of CcmK from *Syn7942* and *Hal7418* species recently studied by Kerfeld and coworkers [34] (Fig. 4A). Identity scores were considerably lower when considering members of the K3 family (56% in average) than within all other CcmK (mean 90% and 68% for K1/K2 and K4 families, respectively) (Table S2). The conservation raised significantly when comparing positions implicated in inter-monomer contacts in CcmK1/K2 and K4 (96 and 81% average identities, respectively), as noticed before [37]. However, the increase almost vanished when residues at the presumed K3 monomer interfaces were compared (58%).

The most remarkable difference, when comparing *Syn6803* K3 to other CcmK paralogs, is the presence of the two ionic bulky amino acids Glu38 and Arg39 (Fig. 4A) [34]. These residues, also present in *Hal7418* K3 but changing to Glu38 and Ser39 in *Syn7942*, would likely clog the central hole of a potential CcmK3 hexamer. Also in common with the *Hal7418* K3, potential secondary structure-disrupting prolines are found in *Syn6803* K3 (Pro49 and Pro83). Other notable substitutions, specific of *Syn6803* K3, are the replacement of a few small/hydrophilic residues by the bulkier/hydrophobic Tyr33, Leu36, Leu55, Met59, and Leu87, and a residue insertion in the stretch composed by Ser67 to Met69.

To further visualize these differences, homology models were built using SWISS-MODEL (CcmK3\_1) and PHYRE2 (CcmK3\_2) algorithms. The resulting monomer models were similar, with average root-mean-squared-deviation (RMSD) of about 0.6 Å calculated for the position of 246 backbone atoms (excluding the C-ter 94-103 residues). Deviations increased slightly for recomposed hexamers (RMSD of 1.0 Å estimated for 1508 backbone atoms). Structural deviations were most remarkable for three stretches (Fig. S5A): residues 37 to 42 around the hypothetical central hexamer pore; the region comprised between Glu66 and Gly71 that connects helix-2 and strand-4, where the mentioned single residue insertion occurs; and the region delineated by residues Leu87 to Pro91.

Besides, different conformers were proposed by the two algorithms for the side-chain of Tyr77. Similarly, the side-chain of Tyr33, which corresponds to Gly or Ser in other paralogs, was also rotated towards the protein surface in CcmK3\_1, but pointing towards the monomer core in CcmK3\_2. Also worth-mentioning, several hydrophobic residues were predicted to lie in the water-exposed side of an  $\alpha$ -helix (e.g. Leu55 and Met59, which are Ala or hydrophilic residues in other sequences) on the hexamer convex surface (Fig. 4B-C), something that would increase the aggregation trend of *Syn6803* CcmK3.

Without evident reason to favor one model over the other, the two were exploited to construct hetero-hexamers combining 5 K4 units and a single K3 monomer, and their behavior was investigated by molecular dynamics simulations, in comparison to K3 homo-hexamers (Fig. S5B). The two K3/K4 hetero-hexamer models built from CcmK3\_1 or CcmK3\_2 displayed similar structural robustness, rearranging slightly over the first nanoseconds but remaining basically unchanged for the rest of the simulation. Remarkably, a closer inspection indicated that the conformation of Tyr33 and Try77 side-chains of CcmK3\_2 model rearranged over the course of simulations to adopt a similar disposition as in the CcmK3\_1 monomer. In agreement with these data, the CcmK3\_1 homo-hexamer model seemed structurally stable, contrasting with the CcmK3\_2-based homo-hexamer that failed to reach convergence. Results were virtually identical in two independent 20 nanosecond MD simulations runs that only differed by the attribution (random seed) of initial atom velocities.

Concerning the reasons that could explain a compatibility between the two contacting interfaces of CcmK3\_1 and CcmK4, a visualization of modeled structures suggested some interactions that might contribute cooperatively. One example could be an ionic interaction between the side-chains of CcmK4 Arg38 and CcmK3 Asp35 (Fig. S6A-4). Such interaction would reproduce what is found in CcmK1 and CcmK2 hexamers (Fig. S6A-1). On the contrary, it is abrogated in CcmK4 (Fig. S6A-2) or in a hypothetical CcmK3 homo-hexamer (Fig. S6A-3) as a consequence of the replacement of one of the two ionic residues by hydrophobic amino acids. Coincidentally, the couple found at the respective positions of the second inter-monomer face of CcmK3 might be advantageous too: CcmK3 Leu36 - CcmK4 Ile37 (Fig. S6A-8). In CcmK1, an ionic pair is found at the corresponding positions (Fig. S6A-5), whereas combinations of hydrophobic plus ionic residues occur in CcmK4 or in modeled CcmK3

hexamers. Similarly, the combined presence of His76 of CcmK3 and Glu70 of CcmK4 might be beneficial (Fig. S6A-12).

The electrostatic properties calculated for the CcmK3\_1-based homo-hexamer are well different from those of other paralogs (Fig. S6B). The isoelectric point (pI) estimated by PropKa for the CcmK3\_1 structure is 7.0, which compares to pI 6.0 and 5.2 for CcmK1 and CcmK4, respectively. The most striking difference was noticed on the electrostatic surface potential from the concave face side, which seemed inversed with regard to those from other paralogs at neutral pH, as pointed out by Sommer *et al.* [37]. The differences were attenuated when a single CcmK3 monomer was modeled within the CcmK4 assembly (pI 5.3 estimated for the hetero-hexamer). Yet, mostly caused by the presence of K3 Glu38 and Arg39, the physical properties of the hetero-hexamer pore would be substantially modified, and the hexagonal symmetry broken.

Overall, the consideration of 3D homology models and results of MD simulations suggest that the stability of CcmK3 might be higher when embedded with CcmK4 than in homo-hexamers. Besides, the augmentation of the hydrophobicity of the *Syn6803* CcmK3 monomer surface, which would cumulate in a homo-hexamer, might be alleviated when combined to CcmK4 in hetero-hexamers.

## **Structural investigations of *Syn6803* CcmK3/K4 hetero-hexamers**

Two experimental approaches were followed to characterize structurally the K3/K4 hetero-hexamer behavior. First, its assembly behavior was monitored by atomic force microscopy (AFM) and compared to the K4 homo-hexamer (Fig. 5A, left). Despite formation of 2D patches noticed in some experiments for K3/K4, the assemblies were smaller and less regular than those obtained with His<sub>4</sub>-tagged K4 homo-hexamers (Fig. 5A, right), which basically reproduced previous published results [23]. Assembly plane with K3/K4 samples positioned about 2.8 nm above mica surfaces, though this value is likely an underestimate induced by high surface coverages. The degree of organization on mica of CcmK1/K2 hetero-hexamers was even lower. Images revealed only the presence of individual hexamers, of clusters of variable size and of some linear arrangements (Fig. 5B). We hypothesize that the decreased assembly potential of the last sample could be in part due to its high molecular heterogeneity, as shown by the variable stoichiometries determined by native ESI-MS.

The crystallization of K3/K4 hetero-hexamers was next attempted. We opted to increase K3/K4 abundance by means of pIsep-FPLC, a chromatofocusing-like purification approach (Fig. 5C). Our intention was to exploit the expected strong interaction with the cationic resin of the anionic DYKDDDDK FLAG peptide in fusion to K3. In that manner, the presumed His<sub>4</sub>-tagged K4 homo-hexamers could be removed, as indicated by the WB analysis of purified fractions that proved that most of the FLAG signal was eluting with the second (most abundant) chromatographic peak. The pooled fractions collected for this peak were used for crystallographic assays.

A condition resulted in a hexagonal crystal form diffracting X-rays to 1.80 Å resolution and displaying two molecules in the asymmetric unit. Unexpectedly, although both CcmK3 and CcmK4 were present in the crystallization solution, the corresponding refined structure unambiguously showed the sole presence of K4 subunits in the asymmetric unit, which organize as canonical homo-hexamers as the result of space group symmetry (structure deposited with PDB code 6SCR, statistics presented in the Table S3). The monomer structures were basically identical to previously solved structures, with only 0.25 and 0.23 Å RMSD for 408 backbone atoms, when compared to structures deposited in the RCSB databank with PDB codes 2A18 and 2A10, respectively. The only novel feature was the observation of a 2D arrangement with similarly-oriented K4 hexamers (Fig. 5D), which therefore differs from the stripped organization described before for the same protein [13], and provides an additional proof of the high structural plasticity of BMC-H proteins.

## **Evaluation of *Syn6803* CcmK hetero-hexamer stability**

CcmK3 absence in crystals prepared from samples of K4/K3 hetero-hexamers pointed to monomer rearrangements occurring during crystallization. To shed light on this possibility, purified His<sub>4</sub>-K4/K3-FLAG was first incubated overnight at variable pH, and under conditions resembling those that resulted in the formation of CcmK4 crystals, and FLAG signals remaining associated to the His<sub>4</sub>-tagged component were quantified by WB after sedimentation of material retained bound to TALON beads. These experiments failed to reveal any signal drop (Fig. 6A, top), independently of the incubation pH or of the presence of the PEG additive, which was included at lower concentrations than for crystallization assays in order to limit protein precipitation. In a similar experiment, we sought to enhance monomer exchange by incubating the K3/K4 hetero-hexamer (combining His<sub>4</sub> and FLAG

monomers) with a 3-fold molar excess of untagged K4 or K1 homo-hexamers. Exchange of K3-FLAG monomer for an untagged subunit was expected to result in a diminution of FLAG readings. However, K4/K3 revealed as stable as the K4 homo-hexamer, signals remaining similar for incubations carried out in the absence or in the presence of untagged hexamers (Fig. 6A, bottom).

Absence of monomer exchange confirmed the consensual vision of BMC-H components as being extremely robust. Similar conclusions had been made in other studies that were conducted on homo-hexamer mixtures and monitored by crosslinking high-mass MALDI-MS or native ESI-MS [38]. Nevertheless, we decided to compare the thermal stability of hetero- vs homo-hexamers by Differential Scanning Fluorimetry (DSF). This technique often permits to monitor protein unfolding processes that expose hydrophobic patches, causing an increase of the fluorescence of a probe. In that manner, *Syn6803* K1/K2 and K3/K4 hetero-hexamers exhibited denaturation profiles with strikingly similar midpoint melting temperatures ( $T_m$ ) of 58.7 and 59.6 °C, respectively (Table S4, Fig. 6B). In comparison, the K1 homo-hexamer seemed reluctant to denaturation, fluorescence readings changing slowly and weakly with temperature, which prevented the determination of a  $T_m$  value. In the case of K4 and K2,  $T_m$  of 89.2 and 62.3 °C were measured, respectively. However, especially for K2, signal amplitudes were low, suggesting that such event could be related to the disruption of dodecamer structures rather than to hexamer unfolding.

Thermal stability was further assessed by Dynamic Light Scattering (DLS), which is very sensitive to aggregation phenomena that often accompanies protein unfolding. Yet, care must be taken in interpreting results, especially considering that CcmK are subject to auto-assembly. Overall, measurements of the light scattered intensities upon augmenting the temperature produced similar trends as DSF and confirmed the lower stability of hetero-hexamers (Fig. 6B). After fitting DLS data to sigmoid functions,  $T_{aggr}$  of 71.3 and 61.3 °C were calculated for K1/K2 and K4/K3 hetero-hexamers, respectively (Table S4). The value for the former was significantly higher than measured by DSF, suggesting that the fluorescent probe could have played a deleterious effect. On the contrary, values estimated by DSF and DSL for K4/K3 were similar. Most importantly,  $T_{aggr}$  values were considerably displaced towards higher values for homo-hexamers. Thus, a  $T_{aggr}$  of 80.6 °C was calculated for K2. It is noteworthy that

$T_{aggr}$  values could not be measured for K1 and K4, the light scattering intensity barely augmenting in experiments with the first, or starting to occur when the T was above 90 °C with the second (Fig. 6B).

## **CcmK3 and CcmK4 paralogs from *Syn. elongatus* PCC 7942 also form hetero-hexamers**

To investigate whether CcmK hetero-oligomerization might be common to other species, we applied the same experimental approach to the study of association between K3 and K4 paralogs of the model *Syn7942*  $\beta$ -cyanobacteria. Plasmids were prepared permitting the co-expression of both isoforms tagged at N- or C-terminus with His<sub>6</sub>- and FLAG-peptides. Protein expression, solubility and purification in *E. coli* were assessed by the same means as for experiments with the *Syn6803* paralogs. Controls were set up to quantify signals obtained when the same paralog (CcmK4) was co-expressed tagged with both His<sub>6</sub> and FLAG tags. By the time of realization of these experiments, Kerfeld and colleagues published evidences on the formation of hetero-hexamers between *Syn7942* K3 and K4 [34]. We decided nevertheless to complete this portion of our study, especially because differences between the two experimental designs might permit to obtain complementary information.

Bands corresponding to K3 co-purifying with His<sub>6</sub>-tagged K4 were evident in Coomassie-stained gels (regardless of tag emplacement) (Fig S7-P, bottom). K3 bands were nevertheless much fainter than those of K4-His<sub>6</sub>, contrasting with similar intensities detected for cellular or soluble fractions (Fig S7-C/S). The ratio of K3/K4 intensities was higher for His<sub>6</sub>-K4 co-expressed with K3-FLAG, when induction was triggered with IPTG, but the effect can probably be attributed to a much lower expression of the His<sub>6</sub>-K4 partner. An interesting observation was that, unlike *Syn6803* K3 that is basically insoluble, *Syn7942* K3 was still present in the soluble fraction when expressed alone, and could be even purified. Also noticeable, purified K4 bands were broad in the Coomassie gels, suggestive of potential degradation of the protein, somehow resembling observations on *Syn6803* K4.

The presence of K3/K4 hetero-hexamers was confirmed on WB. The intensity of FLAG bands in purified fractions was lower for samples containing K3-FLAG than in combinations resulting in K4 homo-hexamers (Fig. 7). Taking into consideration that FLAG signals were comparable for all soluble fractions, these data again suggest that the recruitment of K3-K4 might be suboptimal.

## Discussion

The structural characterization of BMC shells is important to understand function, also for engineering novel structures with properties tailored to new applications in synthetic biology. Among other properties, shell permeability, compartment robustness and adaptability to variable environmental conditions will depend on molecular properties of assembly “bricks”. Until recently, shell components were presumed to be homo-oligomeric associations exclusively. In virtue of a demonstrated structural plasticity of these bricks, which are capable of establishing contacts in various ways, their assembly permits to attain the complex 3D organization observed for BMC [30]. This scenario, however, neglected the possibility that multiple protein paralogs present in a given organism could cross-associate to form heteromers.

Several lines of evidence advocated the formation of such hetero-associations. Bioinformatics surveys have proven the existence of multiple BMC-H (up to 15 genes), BMC-T (up to 5) and BMC-P (up to 7) in given organisms [3]. Very often, several paralog genes are found within a same operon, and therefore are expected to result in simultaneous protein expression. Moreover, paralog homologies are high, residue identities often ranking above 50%. The existence of regulatory mechanisms to ensure the assembly of single type of BMC in the non-rare organisms that are equipped with several BMC candidates [39] might be an additional indication. An example is the repression in *Salmonella enterica* of transcription of the ethanolamine utilization (Eut) BMC by 1,2-propanediol (1,2-PD), the substrate (and inducer) of the propanediol utilization (Pdu) BMC [40]. In this study, phenotypic changes of growth on 1,2-PD, symptomatic of a disrupted BMC shell, were noticed when the microorganism was engineered to permit unregulated expression of Eut proteins or CcmO from cyanobacteria. Such regulatory mechanisms could serve to control the intrinsic structural promiscuity of BMC shell components.

Here, the structural compatibility between *Syn6803* CcmK paralogs was investigated. Presented evidence confirms and complements conclusions reported recently on the association of K3/K4 from *Syn7942* or *Hal7418* [34]. Cross-associations leading to *Syn6803* K1/K2 and K3/K4 hetero-hexamers were demonstrated after screening co-expression of proteins couples. More complex situations implying



the simultaneous production of all four CcmK paralogs not only confirmed the occurrence of the mentioned associations but also highlighted the structural segregation of K1/K2 from K3/K4 paralogs, the two pairs of paralogs being coincidentally encoded together but in separated operons of *Syn6803*. Thus, interactions between His<sub>4</sub>-labeled K4 and K1 or K2 paralogs that insinuated as faint WB signals in studies of CcmK couple combinations (Fig. 1), were absent when all CcmK were expressed together, suggesting that they might be irrelevant, or only being produced under given relative expression regimes.

Cross-association data were more consistent for the *Syn6803* K1/K2 combination. The result was identical, independently of which of the two paralogs carried the His<sub>4</sub> or FLAG peptides. Moreover, WB signal intensities were comparable to those measured for positive homo-hexamer controls based on combinations with the two labels on the same paralog, suggesting efficient competition for association. Analysis of purified samples by native MS/MS confirmed the association of subunits within the same hexamer. Almost all possible stoichiometries were detected, further supporting the good structural miscibility between the two paralogs. Compulsory for detecting mixed K1/K2 associations, the two subunits had to be co-expressed together. No hetero-hexamers were purified after lysis of mixtures of pellets prepared from cells that produced the two subunits separately. This ruled out other possibilities implying lateral contacts between homo-hexamers that might have resulted in similar WB results, or possible subunit exchanges between pre-formed homo-hexamers induced by experimental manipulations. Although the experimental proof presented here was necessary, the existence of K1/K2 hetero-hexamers was not unexpected in view of their high sequence conservation (K1/2 sequences cluster together in phylograms), and that the identity is even higher at inter-monomer or inter-hexamer contact sites (Table S2) [37].

Most remarkable was the purification of *Syn6803* K3 complexes in combination with K4. *Syn6803* K3 is well expressed but recurrently found insoluble when expressed alone in *E. coli*. Despite the improved solubility of *Syn7942* K3, in general K3 proteins seem more prone to aggregation, something that could justify the absence of *in vitro* information for this paralog. The formation of the *Syn6803* K3/K4 hetero-hexamer was first noticed for the combination between the K3-FLAG and His<sub>4</sub>-K4. This observation was confirmed when the four CcmK were co-expressed together, which in addition demonstrated the viability of other construct combinations (i.e. K3-His<sub>4</sub>/FLAG-K4).

Hetero-hexamers also formed upon co-expression of *Syn7942* K3 and K4, thus confirming observations presented recently by Kerfeld and coworkers [34]. In their study, a His<sub>6</sub>/StrepTag tandem purification approach permitted to establish an average 2:4 stoichiometry for the K3:K4 doubly-purified material, which we could also detect for *Syn6803* paralogs, together with the most prominent 1:5 hexamer (according to native ESI-MS intensities and pISep-HPLC data). Here, we also sought to estimate the extent of competition between the integration of subunits to produce hetero- versus homo-hexamers. Although the interpretation is still complicated by parameters such as relative expression/solubility levels of each paralog in *E. coli* or tag tolerance differences among CcmK paralogs, overall trends seem drawn. Thus, CcmK1 and CcmK2 associated with each other as efficiently as with themselves to produce homo-hexamers, whilst the formation of *Syn6803* K4/K3 hetero-hexamers was less productive. The conclusion is based on the lower WB signals when compared to CcmK4 homo-hexamers carrying both His<sub>4</sub>- and FLAG-tags, in spite of the comparable or higher K3 expression levels. Also in support of a suboptimal K3 incorporation, CcmK4 homo-hexamers were detected by native ESI-MS in K3/K4 coexpressed samples (inferred also by pISep-HPLC), and low K3:K4 stoichiometries were characterized (i.e. 1:5 and 2:4). This was also confirmed by the intensity of K3-His<sub>4</sub> Coomassie bands relative to that of the copurified FLAG-K4 band (Fig. S4B). Moreover, in our hands, the competing potential of *Syn7942* K3 seemed even lower. This was especially evidenced by the low WB signals resulting from purified K3/K4 combinations, relative to K4/K4 homo-hexamers (Fig. 7), and by the weak K3:K4 ratio of Coomassie band intensities in K3/K4 purified samples, which contrasted with the comparable, or in occasions considerably higher K3 intensities noticed in soluble fractions (Fig. S7).

A close inspection of the position of *Syn6803* K3 and K4 interfacial residues pinpointed compensatory residue substitutions that might contribute cooperatively to the associations. Indeed, we failed to get proofs in support of a co-evolution of pairs of K3/K4 residues using specialized algorithms (i.e. MISTIC or EVcomplex), possibly because changes of a given residue is likely adapted via variable substitutions of surrounding residues. Hetero-hexamer stability was supported by molecular dynamics trajectories of 3D hetero-hexamers built from combinations of a CcmK4 crystal structure and 3D homology models. Thermal denaturation data validated experimentally this view (measured  $T_m$  values of about 60 °C are for instance comparable to values measured for the HIV-1 capsid protein by similar

means [41]), also experiments that showed that hetero-associations are reluctant to exchange their composing monomers. However, DSF and DLS data indicated that not only *Syn6803* K3/K4, but surprisingly also K1/K2 hetero-hexamers denature at considerably lower temperatures than the homo-hexamers.

Understanding the reason of CcmK paralog multiplicity remains challenging, especially considering that several sources of apparently contradictory data need to be accounted for. Globally, data collected on deletion mutants might suggest that CcmK function could differ depending on the  $\beta$ -cyanobacteria, and possibly in relation with this, on environmental conditions. Redundant roles were initially proposed for *Syn7942* CcmK3 and CcmK4 to explain that photoautotrophic growth was compromised only with the  $\Delta ccmK3\text{-}\Delta ccmK4$  double mutant, but not with each individual knockout strain [42]. These observations were partly revoked recently by experiments that showed that the *ccmK4* knockout grew 2.5 times slower than the WT strain [34]. A similar effect had been ascribed to *Syn6803* *ccmK4* in early studies [43]. These data would therefore point to CcmK3 and CcmK4 proteins playing different roles. Though deletion of *Syn7942* CcmK3 was still without phenotypic consequence, the systematic co-occurrence of *ccmK3/ccmK4* genes in 206 out of 227  $\beta$ -cyanobacteria genomes [37] should be taken as indicative of a non-redundant role. That none of the two occurs alone strongly suggests that at least one of the functions of CcmK3 and CcmK4 must be different from each other and possibly complementary. The importance of CcmK3 may have been missed if it manifested only under certain environmental conditions that were not covered in previous studies. A precedent supports this possibility: the variable growth sensitivity of *Syn7942* to deletion of the *ccmK4* gene, depending on the culturing pH [34].

A shell-capping role was recently proposed for *Syn7942* K3/K4 hetero-hexamers [34]. In such a scenario, K3/K4 associations would position atop other hexamers embedded on the shell layer, presumably modifying their permeability. The interaction would be mediated by ionic residues (E98/R101) present in the C-terminal helix of *Syn7942* CcmK3. The proposition was based on the characterization by size-exclusion chromatography of K3/K4 species with apparent size expected for dodecamers (supposedly being double stacked hexamers), and on the assumption that the assembly of K3 paralogs must be hampered by the replacement of two residues that are key in holding inter-hexamer contacts with all other CcmK, and generally across BMC-H. Actually, AFM data presented here

demonstrated a decline in assembly tendency of *Syn6803* K3/K4 and more surprisingly of the K1/K2 hetero-hexamers – residues implicated in hexamer contacts are identical in K1 and K2, thus suggesting that the same overall effect might be elicited by different means (e.g. the different tendency of each paralog to form curved assemblies [23]) –. However, although K1/K2 displayed in solution the hexamer-dodecamer equilibrium characteristic of the K2 paralog, the *Syn6803* K3/K4 was hexameric, something that fits with a replacement of E98 by Ala in *Syn6803* K3. No evidence of dodecamer was obtained (e.g. by SEC or native ESI-MS). Although we cannot exclude that dodecamers formed under unexplored experimental conditions, these data presently disagree with a K3/K4 shell-capping function in *Syn6803*. In addition, it remains difficult to reconcile the K3/K4 shell-capping model with the fact that some homo-hexamers (e.g. K2) form dodecamers too, also with the fact that E98/R101 residues are shared by other CcmK.

In our opinion, another scenario with K3/K4 associations embedding within shells still deserves consideration. Our data indicate that K3/K4 likely might contribute a minor fraction of the total CcmK pool, being underrepresented compared to CcmK4 homo-hexamers. Hetero-hexamers would occur as a combined result of kinetically-trapped associations, forming during simultaneous translation of operon transcripts, and the sufficiently slow kinetics of subunit exchange. Although with lowered assembly potential, the low K3:K4 stoichiometry and the cooperativity of such interactions could still be compatible with their integration within shells. Indeed, AFM data from us and others prove that the mutation of single key residues implicated in inter-hexamer contacts is often insufficient to abolish the formation of BMC-H 2D assemblies [22, 23]. Similarly, R79A and N29A PduA mutants were found to accompany purified Pdu BMC, albeit with phenotypic features indicative of damaged shells [44]. Local defects at contact edges between K3 and neighboring hexamers might then constitute entry points for the exchange of subunits or the action of dedicated editing machineries (e.g. chaperones or proteases). Though not compulsory, the lower stability of K3/K4 hetero-hexamers might facilitate the remodeling/editing processes. In that manner, shell properties would be readapted to changing environmental conditions in a simpler, faster and less energy-consuming manner than if new compartments had to be built. The importance of CcmK3 would manifest itself only under given conditions that were not covered before. Like CcmK1 or CcmK2, CcmK4 would be essential in virtue

of the structural and permeability properties furnished by the homo-hexamer. Transcriptomic data indicated that the *Syn6803* K3-K4 operon was active under almost the full set of screened culturing conditions, whereas transcription of the K1/K2-containing operon seemed triggered by light [36]. It is therefore possible that the K3-K4 to K1-K2 ratio in *Syn6803* shells could shift depending on conditions, something facilitated by the segregation of paralogs in two loci. Carboxysome aggregation revealed in early stages of biogenesis and later migration within cells could fit this model of action (Cameron Kerfeld 2013; Chen Polka 2013), especially considering that *Syn7942* K3 (also K2) seem to interact with components that work to maintain a correct carboxysome distribution (MacCready Ducat 2018). Intriguingly, carboxysome aggregation was also noticed inside a  $\Delta$ CcmK3/K4 *Syn7942* double knockout cells (Rae Price 2012).

The ccmK3 gene might also constitute a regulatory means to modify the ratio of incorporation of other CcmK within shells. Data presented in the figure S3 prove that co-expression of K3 alters the solubility of other paralogs, a possibility reaffirmed in experiments of co-expression of the four CcmK (Fig. S4). The effect was especially notorious with K1, a protein that remains in soluble fractions in comparable or higher amounts than K2 or K4, when expressed individually (Fig. S1 and S2), but was barely detected in combinations including K3. Despite K1-His<sub>4</sub> still expressed, bands were absent in soluble fractions from combinations with K3 (white arrows in Fig. S3B and S4B). Such observation suggest that CcmK3 could act as a “protein precipitation trap”. We indicate, however, that soluble K1-FLAG was still visible in combinations with K3-His<sub>4</sub> (black arrows in Fig. S3B), although with smaller intensities than in co-expression with other His<sub>4</sub>-tagged proteins. Such paralog incompatibility might reflect a mechanism permitting to exhaust K1 arrival to shells, maybe allowing an enrichment by the K4 paralog or preventing formation of K1/K2 hetero-hexamers. Alternatively, such observation might be without effect in the natural host if expression from K1-K2 and K3-K4 operons was decoupled in time.

Although the present studies were conducted in *E. coli*, cumulated evidence strongly suggest that hetero-hexamers form in cyanobacteria. Most convincing, the three cases studied here and before (*Syn6803*, *Syn7942*, *Hal7418*) were positive in demonstrating K3/K4 paralog compatibility. Experiments on knockout strains, however, will be required to establish functional differences among species, to clarify paralog redundancies, and to address more specifically the importance and roles of

hetero-hexamer occurrence. With the exception of the mentioned study of the CcmK4 knockout strain, the physiological importance of individual *Syn6803* CcmK1, CcmK2 or CcmK3, or of combined CcmK1/K2 or CcmK3/K4 couples remains unexplored, to the best of our knowledge. Another point that would deserve attention is the extent of cross-interactions with other Pfam000936 members of *Syn6803*: CcmO and CcmP. Indeed, preliminary data validating some cross-associations were collected and some n-ESI-MS data were presented in a Ph.D. thesis, together with a likely over-simplified interpretation that needs to be reconsidered [38]. Future experiments are also necessary to investigate the connection between regulatory mechanisms and BMC-H promiscuity in species harboring several BMC, also to ascertain whether disrupted shells, which form in Eut-unregulated *Salmonella enterica*, could be caused by the potential integration in shells of heteromers combining monomers from different BMC types (and not of homo-hexamers from different BMC) [40]. Some published data will also have to be reinterpreted in the light of these findings. For instance, Cai *et al.* presented data (basically fluorescence images) to support the formation of BMC chimeras integrating CsoS1 (i.e. homo-hexamers) from *Prochlorococcus marinus* str. MIT9313 into  $\beta$ -carboxysome shells from *Syn7942* [7]. Yet, the formation of hexamers combining CsoS1 and CcmK subunits should not be excluded. Indeed, considering that the YFP domain attached to CsoS1 monomers is considerably bulkier than SUMO domains exploited by the same authors to prevent BMC-H component assembly *in vitro* [45], the resulting CsoS1-YFP hexamers would be expected to be assembly-incompetent. If these arguments hold true, fluorescence puncta observed *in vivo* should result from the integration on shells of CsoS1-YFP/CcmK hexamers.

## Materials and Methods

### Cloning

Full-length DNA sequences coding for shell proteins from *Synechocystis* sp. PCC6803, as well as for CcmK3 and CcmK4 from *Synechococcus elongatus* PCC7942 were synthesized (Genecust and Twist Bioscience, provided in List S1). Sequences included stretches for N-ter or C-ter tag extensions, exception made of untagged proteins. To characterize individual proteins, sequences were cloned in pET15b using XbaI/XhoI sites. For co-expression studies, manipulations were carried out in pBlueScript II SK+ (Stratagene) after cloning between SacI and KpnI sites a synthetic sequence that comprised four

cassettes with independent T7 promoter/lac operator, RBS and T7 terminators (shown in List S1). For co-expression of protein couples, the fourth and second cassette were removed stepwise, using AvrII or BamHI/AgeI restriction enzymes (blunt ends prepared by reaction with Klenow fragment LC, Thermofisher), respectively, followed by plasmid recircularization after each step. The different ccmK sequences were integrated using SwaI/BamHI (1<sup>st</sup> cassette), PacI/AgeI (2<sup>nd</sup>), MfeI/SalI (3<sup>rd</sup>) or BsrGI/HindIII (4<sup>th</sup>), respectively. All sequences are detailed in List S1. Treatments with BglII/BlpI permitted the transfer of final products to pET-26b. Resulting vectors were used to transform chimio-competent BL21(DE3) *E. coli* cells, following standard protocols.

### **Expression, solubility and protein purification**

All cell cultures corresponding to combinations with a given His-tagged protein were carried out in parallel, applying strictly the same protocol. Handled typical volumes were often 10 to 30 mL. When the cultures growing in LB at 37°C reached mid log phase ( $OD^{600nm} = 0.6-0.8$ ), expression was induced with 0.2 mM IPTG (final conc.). Incubation was continued for 3-4 hours before cells were harvested at 6000 g and supernatant (SN) discarded. In studies of expression of 4 combined proteins, in order to increase yields of purified material, experiments were also carried out in ZYM-5052 auto-induction media [46]. After inoculation with 1/100<sup>th</sup> volume of an overnight saturated pre-culture in LB, incubations were shaken at 220 rpm for 15 hours, at 37°C.

Cellular lysis was carried out in 1/10<sup>th</sup> of culture volume of 20 mM NaPi, 300 mM NaCl, 10 mM imidazole, pH 8), supplemented with DNase I (5 µg/mL final conc.) and lysozyme (0.05 mg/mL). Protease inhibitors aprotinin (10 µM, final conc.), leupeptin (20 µM) and pepstatin (2 µM) were also present. After incubation at room temperature with gentle agitation for 5 to 10 minutes, cells were sonicated at 4°C. Four cycles of 30 sec sonication at 25% power, spaced by 1 min lags were applied (SO-VCX130 equipped with a 630-0422 probe, Sonics). The inhibitor phenylmethylsulfonyl fluoride was added right after the first cycle (PMSF, 1 mM). Insoluble debris were removed by centrifugation for 20 min at 20000 x g (4°C). The supernatant (soluble fraction) was applied to cobalt-loaded TALON Superflow metal affinity resin (Clontech) preconditioned in Sol A (20 mM NaPi, 300 mM NaCl, 10 mM imidazole, pH 8.0). After thoroughly washing with Sol A, elution was performed with Sol B (300 mM imidazole in Sol A). A single fraction was collected, to which EDTA (5 mM final conc.) was added

immediately after elution. SDS–polyacrylamide gels (15%) for Coomassie staining or Western Blots were run using Tris-Glycine-SDS buffer after loading heat denatured samples (95°C, 10 min, in loading dye (LD) preparation for SDS-PAGE) prepared from freshly lysed cells, from soluble fractions and from purified material. Loaded volumes of lysed cells and purified fractions were identical for all samples corresponding to combinations with a given His-tagged protein. In the case of soluble fractions, volumes were adjusted taking into consideration absorption values at 280 nm of supernatants.

When required for ulterior analyses, proteins were buffer-exchanged against Sol C (10 mM HEPES, 300 mM NaCl, pH 7.5) by 3-4 steps 10-fold dilution/concentration steps in Vivaspin Turbo 15, 10 kDa MWCO devices, before being concentrated to 1-2 mg/mL. Protein concentrations were estimated from 280 nm absorption readings, using theoretical extinction coefficients calculated from protein sequences by the ExPASy ProtParam tool (<http://web.expasy.org/protparam/>).

### **Western blot analysis**

After SDS-PAGE, gel contents were electro-transferred to a PVDF membrane (Immobilion-P, Milipore). Membranes were blocked at room temperature (rt) for 1 hr in 5% nonfat dry milk in TBS containing 0.05% Tween 20. Standard protocols were applied for ulterior treatments. Primary antibody immunolabelling was carried out for 1hr at rt with 1:2000 diluted FLAG tag mouse monoclonal antibody (FG4R, ThermoFisher). After incubation with the secondary alkaline phosphatase-conjugated goat Anti-Mouse IgG (H+L) secondary antibody, and extensive washings, blots were developed with the Sigmafast BCIP/NBT substrate.

### **Native mass spectrometry**

Prior to analysis, protein tags were removed by incubation overnight at 25°C with turbo TEV protease (GenWay, 5 µg/mL final) in 50 mM Tris pH 8.0 / 300 mM NaCl / 2 mM DTT / 1 mM EDTA. After exchanging buffer by Sol C, proteins were concentrated to 1-2 mg/mL. Right prior to spraying, the samples were buffer-exchanged against 150 mM aqueous ammonium acetate at pH 8 using Amicon Ultra-0.5 mL centrifugal filters (MWCO = 10 kDa; Millipore). MS measurements were performed in positive ion mode exactly as described before [23]. For tandem mass spectrometry experiments, precursor ions were isolated in the quadrupole mass analyzer and accelerated into an argon-filled linear



hexapole collision cell ( $P = 3.0 \times 10^{-2}$  mbar). Various collision energy offsets were applied upstream of the collision cell.

## Size-exclusion chromatography

Protein sizes were estimated by SEC using a Beckman Ultraspherogel SEC2000 column (7.5 x 300 mm) mounted on a Waters 2690 HPLC separation module. Samples (10-20  $\mu$ L) were injected at 1 mL/min flowrate after conditioning the column in 20 mM Tris-HCl, 300 mM NaCl at pH 7. Elution was monitored with a Waters 996 Photodiode Array Detector. Elution volumes (280 nm absorption) were used to estimate protein MW by comparison to next calibration standards run under identical conditions: Ferritin (440 kDa), Aldolase (158 kDa), Conalbumin (75 kDa), Ovalbumin (43 kDa) and Ribonuclease (13.7 kDa).

## CcmK3 and CcmK3/K4 homology models and molecular dynamics simulations

Homology models for CcmK3 *Syn6803* homo-hexamers were built using SWISS-MODEL and PHYRE2 algorithms. Templates selected for 3D model reconstruction differed between the two, corresponding to the *Syn7942* CcmK1/2 (PDB ID 4OX7, residue identity of 53 %) using SWISS-MODEL, or the structure of *Syn6803* CcmK4 (2A10, 47 % identity) with PHYRE2. Hetero-hexamers were recomposed by replacing one of the monomers of the 2A10 CcmK4 structure by CcmK3 modeled monomers (previously superimposed by minimizing RMSD of monomer main-chain atoms). Few side-chain clashes between monomers in recomposed hexamers were relaxed using steepest descent energy minimization approaches.

Molecular dynamics simulations were carried using the AMBER14 forcefield implemented within YASARA software. After a first energy minimization within YASARA, hexamers were hydrated within a cubic cell with dimensions extending 10 Å beyond edge protein atoms, which was filled with explicit solvent. Periodic boundary conditions were applied. YASARA's pKa utility was used to assign residue protonation states at pH 7.0. The simulation cell was neutralized with NaCl (0.9 % (w/v) final concentration) by iteratively placing sodium and chlorine ions at the coordinates with the lowest electrostatic potential. The cut-off for the Lennard-Jones potential and the short-range electrostatics was 8 Å. Long-range electrostatics were calculated using the Particle Mesh Ewald (PME) method with a grid

spacing of 1.0 Å, 4<sup>th</sup> order PME-spline, and PME tolerance of 10<sup>-5</sup> for the direct space sum. The entire system was energy-minimized using steepest descent minimization, in order to remove conformational stress, followed by a simulated annealing minimization until convergence (<0.05 kJ/mol/200 steps). Simulations were run at 298 K, with integration time steps for intra-molecular and inter-molecular forces of 1 fs and 2 fs, respectively. Two identical 20 ns simulations were run starting from the same structure, but differing by the attribution of random initial atom velocities. Intermediate structures were saved every 250 ps. Dihedral angle analysis and generation of figures was carried out with scripts run within Pymol (<https://www.pymol.org/>).

### **AFM imaging**

Purified protein was diluted 10 to 50-fold with 10 mM NaPi, 300 mM NaCl to pH 6. Typically, 2 µL of the solution was then dispensed onto freshly-cleaved mica and proteins were allowed to adsorb for longer than 10 min. Samples were imaged after dilution with 150 µl of the same buffer. Standard image analysis and treatments were initially performed using NanoScope Analysis software (Bruker). When necessary, AFM images were processed with 0 to 3<sup>th</sup> order plane fitting and 0 to 3<sup>rd</sup> order flattening to reduce XY tilt. For further details on experimental approach and instrumentation, please refer to [23].

### **Protein crystallization**

A CcmK3/CcmK4 purified hetero-hexamer at 2 mg/mL was 5-fold diluted in buffer D (10 mM Tris, 20 mM NaCl, pH 7.5) and injected into a MiniQ PE 4.6/50 column at 0.5 mL/min rate on an AKTA purifier FPLC equipment. Elution was performed with a 20 mL linear gradient from 0 to 80% buffer E, at 1 mL/min. Buffer E consisted of a mixture of 1,2-ethylenediamine (9.1 mM), 1-methylpiperazine (6.4 mM), 1,4-dimethylpiperazine (13.7 mM), Bis-Tris (5.8 mM), hydroxylamine (7.7 mM) and NaCl (300 mM) adjusted to pH 5.1 with HCl [47]. Immediately after elution, fractions (0.5 mL) were supplemented with 10 µL of 1 M HEPES pH 7.5. Only the two fractions following the most intense peak were pooled together. After overnight dialysis at 4°C, overnight, against 500 volumes of 10 mM Tris, 150 mM NaCl, at pH 8, the sample was concentrated to 2.9 mg/mL using Vivaspin 0.5 mL membrane concentrators (10 kDa MWCO).

Screening of crystallization conditions was performed using a Mosquito drop dispensing automate (TTPLabtech) and crystallization screens (Qiagen). Drops were prepared by mixing 150 nL of protein

solution with an equivalent volume of screening solution, at 12 °C. Crystals formed in drops prepared from reservoirs containing 22 % (w/v) PEG 4000, 0.2 M ammonium sulfate and 0.1 M sodium acetate at pH 4.6. Crystals were briefly immersed in the reservoir solution supplemented with 20 % ethylene-glycol before being cooled at 100 K in a cooled gaseous nitrogen flux. Diffraction data were collected on beamline ID30A3 at ESRF (European Synchrotron Radiation Facility, Grenoble, France) and processed using AUTOPROC (GlobalPhasing, Cambridge, UK) and XDS.

The structure was solved using the molecular replacement method, as implemented in PHASER [48]. As the crystal potentially contained both CcmK3 and CcmK4, a model was built from the structure of CcmK4 (PDB entry 2A18), truncating all non-common side chains to alanine. The structure was refined with REFMAC [49] and COOT [50] from the CCP4 suite of programs [51], and deposited in the RCSB databank with PDB code 6SCR.

## **Protein thermal denaturation studies**

Differential Scanning Fluorimetry was used to characterize the thermal stability of selected homo- and hetero-heterohexamers. Mixtures of 20- $\mu$ l of the sample (8-10  $\mu$ M final, considering hexamers) and SYPRO Orange ( $\times 100$ ; Invitrogen) in Sol C were subjected to a temperature gradient from 20 to 100 °C with increments of 0.3 °C every 10 sec. Measurements were performed in triplicate in 96-well plates (Bio-Rad) with a real-time PCR CFX96 System (Bio-Rad). Melting temperatures ( $T_m$ ) were extracted after adjustment of the full set of data from 2-3 experiments to a sigmoidal function using PRISM software, after normalization of fluorescence intensities.

Temperature-induced aggregation was evaluated using Dynamic Light Scattering. Assays were conducted on 10  $\mu$ L of the protein sample in Sol C, applying a temperature gradient from 20 to 100 °C. Experiments were performed in a Zetasizer APS instrument (Malvern™, Panalytical Ltd., Malvern, UK). Scattered intensities were measured in function of the temperature (1 point/s, 2°C/minute), and normalized.  $T_{aggr}$  values were extracted after adjustment of the full set of data from 2-4 experiments to a sigmoidal function using PRISM software.

## Monomer exchange experiments

Untagged *Syn6803* K1 and K4 proteins were prepared by overnight treatment of TALON-purified His<sub>4</sub>-tagged proteins following a described protocol [23]. After reaction, the solutions were flushed through TALON resins, which permitted to eliminate the TEV protease and possible unreacted protein traces. The flowthrough was collected, buffer exchanged against solution C, and concentrated to 1-2 mg/mL using 10 kDa MWCO concentrator units.

Subunit exchange studies were carried out in two ways. First, purified His<sub>4</sub>-K4/K3-FLAG (7  $\mu$ M final conc, 25  $\mu$ L total volume) was conditioned in solutions with 50 mM NaPi (at pH 9 or pH 7) or NaAcetate (pH 5), 100 mM NaCl and 100 mM ammonium sulfate. In some cases, the mixture included 14% PEG 3350. In second type of experiment, the doubly-tagged His<sub>4</sub>/FLAG- homo- or hetero-hexamer (2  $\mu$ M final conc, 25  $\mu$ L total volume) in 50 mM NaPi (pH 8.0), 100 mM NaCl, and 0.15 mg/mL (final) of BSA (added to limit protein losses) was incubated in the absence or presence of untagged K1 or K4 (6  $\mu$ M). Incubations were performed at room temperature, overnight. After addition of Tris buffer (150 mM final, pH 8), the TALON-resin was added (25  $\mu$ L of 50% slurry, preconditioned in Sol A). The mixture was maintained at 4°C, 5 min, with periodical shaking. After spinning down and removing supernatant to approximately dryness, 20  $\mu$ L of a mixture containing LD (x1.5 final), EDTA (10 mM) and imidazole (300 mM) was added to the resin, and the mixture was heat denatured, before proceeding to WB analysis, as described.

## Acknowledgements

We thank the scientific staff of the European Synchrotron Radiation Facility (Grenoble, France) and ALBA (Barcelona, Spain) for the use of their excellent data collection facilities. The DLS, DSF, and macromolecular crystallography equipment used in this study are part of the Integrated Screening Platform of Toulouse (PICT, IBiSA). Financial support for the mass spectrometry studies by the Swiss National Science Foundation (grant number 200020\_159929) is acknowledged. AFM work was funded by FEDER grants.

## References

1. Kerfeld CA, Aussignargues C, Zarzycki J, Cai F, Sutter M. Bacterial microcompartments. *Nat Rev Microbiol.* 2018;16(5):277-90. Epub 2018/03/05. doi: 10.1038/nrmicro.2018.10. PubMed PMID: 29503457; PubMed Central PMCID: PMC6022854.
2. Chowdhury C, Sinha S, Chun S, Yeates TO, Bobik TA. Diverse bacterial microcompartment organelles. *Microbiol Mol Biol Rev.* 2014;78(3):438-68. doi: 10.1128/MMBR.00009-14. PubMed PMID: 25184561; PubMed Central PMCID: PMC6022854.
3. Axen SD, Erbilgin O, Kerfeld CA. A taxonomy of bacterial microcompartment loci constructed by a novel scoring method. *PLoS Comput Biol.* 2014;10(10):e1003898. Epub 2014/10/23. doi: 10.1371/journal.pcbi.1003898. PubMed PMID: 25340524; PubMed Central PMCID: PMC4207490.
4. Kinney J, Salmeen A, Cai F, Kerfeld C. Elucidating Essential Role of Conserved Carboxysomal Protein CcmN Reveals Common Feature of Bacterial Microcompartment Assembly. *Journal of Biological Chemistry.* 2012;287(21):17729-36. doi: 10.1074/jbc.M112.355305. PubMed PMID: WOS:000306373000071.
5. Fan C, Cheng S, Liu Y, Escobar CM, Crowley CS, Jefferson RE, et al. Short N-terminal sequences package proteins into bacterial microcompartments. *Proc Natl Acad Sci U S A.* 2010;107(16):7509-14. doi: 10.1073/pnas.0913199107. PubMed PMID: 20308536; PubMed Central PMCID: PMC2867708.
6. Lawrence AD, Frank S, Newnham S, Lee MJ, Brown IR, Xue WF, et al. Solution structure of a bacterial microcompartment targeting peptide and its application in the construction of an ethanol bioreactor. *ACS Synth Biol.* 2014;3(7):454-65. Epub 2014/02/24. doi: 10.1021/sb4001118. PubMed PMID: 24933391; PubMed Central PMCID: PMC4880047.
7. Cai F, Sutter M, Bernstein SL, Kinney JN, Kerfeld CA. Engineering bacterial microcompartment shells: chimeric shell proteins and chimeric carboxysome shells. *ACS Synth Biol.* 2015;4(4):444-53. Epub 2014/08/27. doi: 10.1021/sb500226j. PubMed PMID: 25117559.
8. Slininger Lee MF, Jakobson CM, Tullman-Ercek D. Evidence for Improved Encapsulated Pathway Behavior in a Bacterial Microcompartment through Shell Protein Engineering. *ACS Synth Biol.* 2017;6(10):1880-91. Epub 2017/06/21. doi: 10.1021/acssynbio.7b00042. PubMed PMID: 28585808.
9. Bonacci W, Teng PK, Afonso B, Niederholtmeyer H, Grob P, Silver PA, et al. Modularity of a carbon-fixing protein organelle. *Proc Natl Acad Sci U S A.* 2012;109(2):478-83. doi: 10.1073/pnas.1108557109. PubMed PMID: 22184212; PubMed Central PMCID: PMC3258634.
10. Cai F, Bernstein SL, Wilson SC, Kerfeld CA. Production and Characterization of Synthetic Carboxysome Shells with Incorporated Luminal Proteins. *Plant Physiol.* 2016;170(3):1868-77. Epub 2016/01/20. doi: 10.1104/pp.15.01822. PubMed PMID: 26792123; PubMed Central PMCID: PMC4775138.
11. Parsons JB, Dinesh SD, Deery E, Leech HK, Brindley AA, Heldt D, et al. Biochemical and structural insights into bacterial organelle form and biogenesis. *J Biol Chem.* 2008;283(21):14366-75. doi: 10.1074/jbc.M709214200. PubMed PMID: 18332146.

12. Fang Y, Huang F, Faulkner M, Jiang Q, Dykes GF, Yang M, et al. Engineering and Modulating Functional Cyanobacterial CO. *Front Plant Sci.* 2018;9:739. Epub 2018/06/05. doi: 10.3389/fpls.2018.00739. PubMed PMID: 29922315; PubMed Central PMCID: PMC5996877.
13. Kerfeld CA, Sawaya MR, Tanaka S, Nguyen CV, Phillips M, Beeby M, et al. Protein structures forming the shell of primitive bacterial organelles. *Science.* 2005;309(5736):936-8. doi: 10.1126/science.1113397. PubMed PMID: 16081736.
14. Tanaka S, Sawaya MR, Yeates TO. Structure and mechanisms of a protein-based organelle in *Escherichia coli*. *Science.* 2010;327(5961):81-4. doi: 10.1126/science.1179513. PubMed PMID: 20044574.
15. Samborska B, Kimber MS. A dodecameric CcmK2 structure suggests  $\beta$ -carboxysomal shell facets have a double-layered organization. *Structure.* 2012;20(8):1353-62. doi: 10.1016/j.str.2012.05.013. PubMed PMID: 22748766.
16. Crowley CS, Sawaya MR, Bobik TA, Yeates TO. Structure of the PduU shell protein from the Pdu microcompartment of *Salmonella*. *Structure.* 2008;16(9):1324-32. doi: 10.1016/j.str.2008.05.013. PubMed PMID: 18786396; PubMed Central PMCID: PMC5878062.
17. Pitts AC, Tuck LR, Faulds-Pain A, Lewis RJ, Marles-Wright J. Structural insight into the *Clostridium difficile* ethanolamine utilisation microcompartment. *PLoS One.* 2012;7(10):e48360. Epub 2012/10/29. doi: 10.1371/journal.pone.0048360. PubMed PMID: 23144756; PubMed Central PMCID: PMC3483176.
18. Mallette E, Kimber MS. A Complete Structural Inventory of the Mycobacterial Microcompartment Shell Proteins Constrains Models of Global Architecture and Transport. *J Biol Chem.* 2017;292(4):1197-210. Epub 2016/12/06. doi: 10.1074/jbc.M116.754093. PubMed PMID: 27927988.
19. Cai F, Sutter M, Cameron JC, Stanley DN, Kinney JN, Kerfeld CA. The structure of CcmP, a tandem bacterial microcompartment domain protein from the  $\beta$ -carboxysome, forms a subcompartment within a microcompartment. *J Biol Chem.* 2013;288(22):16055-63. doi: 10.1074/jbc.M113.456897. PubMed PMID: 23572529; PubMed Central PMCID: PMC3668761.
20. Heldt D, Frank S, Seyedarabi A, Ladikis D, Parsons JB, Warren MJ, et al. Structure of a trimeric bacterial microcompartment shell protein, EtuB, associated with ethanol utilization in *Clostridium kluyveri*. *Biochem J.* 2009;423(2):199-207. Epub 2009/09/25. doi: 10.1042/BJ20090780. PubMed PMID: 19635047.
21. Dryden K, Crowley C, Tanaka S, Yeates T, Yeager M. Two-dimensional crystals of carboxysome shell proteins recapitulate the hexagonal packing of three-dimensional crystals. *Protein Science.* 2009;18(12):2629-35. doi: 10.1002/pro.272. PubMed PMID: WOS:000272757200020.
22. Sutter M, Faulkner M, Aussignargues C, Paasch BC, Barrett S, Kerfeld CA, et al. Visualization of Bacterial Microcompartment Facet Assembly Using High-Speed Atomic Force Microscopy. *Nano Lett.* 2016;16(3):1590-5. Epub 2015/12/07. doi: 10.1021/acs.nanolett.5b04259. PubMed PMID: 26617073; PubMed Central PMCID: PMC4789755.

23. Garcia-Alles LF, Lesniewska E, Root K, Aubry N, Pocholle N, Mendoza CI, et al. Spontaneous non-canonical assembly of CcmK hexameric components from  $\beta$ -carboxysome shells of cyanobacteria. *PLoS One*. 2017;12(9):e0185109. Epub 2017/09/21. doi: 10.1371/journal.pone.0185109. PubMed PMID: 28934279; PubMed Central PMCID: PMC5608322.
24. Iancu CV, Ding HJ, Morris DM, Dias DP, Gonzales AD, Martino A, et al. The structure of isolated *Synechococcus* strain WH8102 carboxysomes as revealed by electron cryotomography. *J Mol Biol*. 2007;372(3):764-73. Epub 2007/06/29. doi: 10.1016/j.jmb.2007.06.059. PubMed PMID: 17669419; PubMed Central PMCID: PMC5608322.
25. Schmid MF, Paredes AM, Khant HA, Soyer F, Aldrich HC, Chiu W, et al. Structure of *Halothiobacillus neapolitanus* carboxysomes by cryo-electron tomography. *J Mol Biol*. 2006;364(3):526-35. Epub 2006/09/14. doi: 10.1016/j.jmb.2006.09.024. PubMed PMID: 17028023; PubMed Central PMCID: PMC5608322.
26. Kaneko Y, Danev R, Nagayama K, Nakamoto H. Intact carboxysomes in a cyanobacterial cell visualized by hilbert differential contrast transmission electron microscopy. *J Bacteriol*. 2006;188(2):805-8. doi: 10.1128/JB.188.2.805-808.2006. PubMed PMID: 16385071; PubMed Central PMCID: PMC5608322.
27. Tanaka S, Kerfeld CA, Sawaya MR, Cai F, Heinhorst S, Cannon GC, et al. Atomic-level models of the bacterial carboxysome shell. *Science*. 2008;319(5866):1083-6. doi: 10.1126/science.1151458. PubMed PMID: 18292340.
28. Wheatley NM, Gidaniyan SD, Liu Y, Cascio D, Yeates TO. Bacterial microcompartment shells of diverse functional types possess pentameric vertex proteins. *Protein Sci*. 2013;22(5):660-5. Epub 2013/04/08. doi: 10.1002/pro.2246. PubMed PMID: 23456886; PubMed Central PMCID: PMC5608322.
29. Forouhar F, Kuzin A, Seetharaman J, Lee I, Zhou W, Abashidze M, et al. Functional insights from structural genomics. *J Struct Funct Genomics*. 2007;8(2-3):37-44. Epub 2007/06/23. doi: 10.1007/s10969-007-9018-3. PubMed PMID: 17588214.
30. Sutter M, Greber B, Aussignargues C, Kerfeld CA. Assembly principles and structure of a 6.5-MDa bacterial microcompartment shell. *Science*. 2017;356(6344):1293-7. doi: 10.1126/science.aan3289. PubMed PMID: 28642439.
31. Pang A, Frank S, Brown I, Warren MJ, Pickersgill RW. Structural insights into higher order assembly and function of the bacterial microcompartment protein PduA. *J Biol Chem*. 2014;289(32):22377-84. Epub 2014/05/29. doi: 10.1074/jbc.M114.569285. PubMed PMID: 24873823; PubMed Central PMCID: PMC5608322.
32. Young EJ, Burton R, Mahalik JP, Sumpter BG, Fuentes-Cabrera M, Kerfeld CA, et al. Engineering the Bacterial Microcompartment Domain for Molecular Scaffolding Applications. *Front Microbiol*. 2017;8:1441. Epub 2017/07/31. doi: 10.3389/fmicb.2017.01441. PubMed PMID: 28824573; PubMed Central PMCID: PMC5608322.
33. Yeates T, Kerfeld C, Heinhorst S, Cannon G, Shively J. Protein-based organelles in bacteria: carboxysomes and related microcompartments. *Nature Reviews Microbiology*. 2008;6(9):681-91. doi: 10.1038/nrmicro1913. PubMed PMID: WOS:000258413100013.

34. Sommer M, Sutter M, Gupta S, Kirst H, Turmo A, Lechno-Yossef S, et al. Heterohexamers Formed by CcmK3 and CcmK4 Increase the Complexity of Beta Carboxysome Shells. *Plant Physiol.* 2019;179(1):156-67. Epub 2018/11/02. doi: 10.1104/pp.18.01190. PubMed PMID: 30389783; PubMed Central PMCID: PMC6324227.
35. Tanaka S, Sawaya MR, Phillips M, Yeates TO. Insights from multiple structures of the shell proteins from the beta-carboxysome. *Protein Sci.* 2009;18(1):108-20. doi: 10.1002/pro.14. PubMed PMID: 19177356; PubMed Central PMCID: PMC6324227.
36. Kopf M, Klähn S, Scholz I, Matthiessen JK, Hess WR, Voß B. Comparative analysis of the primary transcriptome of *Synechocystis* sp. PCC 6803. *DNA Res.* 2014;21(5):527-39. Epub 2014/06/16. doi: 10.1093/dnares/dsu018. PubMed PMID: 24935866; PubMed Central PMCID: PMC4195498.
37. Sommer M, Cai F, Melnicki M, Kerfeld CA.  $\beta$ -Carboxysome bioinformatics: identification and evolution of new bacterial microcompartment protein gene classes and core locus constraints. *J Exp Bot.* 2017;68(14):3841-55. doi: 10.1093/jxb/erx115. PubMed PMID: 28419380; PubMed Central PMCID: PMC5853843.
38. Root K. Doctoral Thesis: Dissecting Non-covalent Interactions in Oligomeric Protein Complexes by Native Mass Spectrometry. ETH Zurich 2018.
39. Abdul-Rahman F, Petit E, Blanchard JL. The Distribution of Polyhedral Bacterial Microcompartments Suggests Frequent Horizontal Transfer and Operon Reassembly. *Journal of Phylogenetics and Evolutionary Biology.* 2013;1:118. doi: 10.4172/2329-9002.1000118.
40. Sturms R, Streauslin NA, Cheng S, Bobik TA. In *Salmonella enterica*, Ethanolamine Utilization Is Repressed by 1,2-Propanediol To Prevent Detrimental Mixing of Components of Two Different Bacterial Microcompartments. *J Bacteriol.* 2015;197(14):2412-21. Epub 2015/05/11. doi: 10.1128/JB.00215-15. PubMed PMID: 25962913; PubMed Central PMCID: PMC4524194.
41. Lidón-Moya MC, Barrera FN, Bueno M, Pérez-Jiménez R, Sancho J, Mateu MG, et al. An extensive thermodynamic characterization of the dimerization domain of the HIV-1 capsid protein. *Protein Sci.* 2005;14(9):2387-404. doi: 10.1110/ps.041324305. PubMed PMID: 16131662; PubMed Central PMCID: PMC2253484.
42. Rae BD, Long BM, Badger MR, Price GD. Structural determinants of the outer shell of  $\beta$ -carboxysomes in *Synechococcus elongatus* PCC 7942: roles for CcmK2, K3-K4, CcmO, and CcmL. *PLoS One.* 2012;7(8):e43871. doi: 10.1371/journal.pone.0043871. PubMed PMID: 22928045; PubMed Central PMCID: PMC3425506.
43. Zhang S, Laborde SM, Frankel LK, Bricker TM. Four novel genes required for optimal photoautotrophic growth of the cyanobacterium *Synechocystis* sp. strain PCC 6803 identified by in vitro transposon mutagenesis. *J Bacteriol.* 2004;186(3):875-9. doi: 10.1128/jb.186.3.875-879.2004. PubMed PMID: 14729717; PubMed Central PMCID: PMC321504.
44. Sinha S, Cheng S, Sung YW, McNamara DE, Sawaya MR, Yeates TO, et al. Alanine scanning mutagenesis identifies an asparagine-arginine-lysine triad essential to assembly of the shell of the Pdu microcompartment. *J Mol Biol.* 2014;426(12):2328-45. Epub 2014/04/18. doi: 10.1016/j.jmb.2014.04.012. PubMed PMID: 24747050; PubMed Central PMCID: PMC4089897.



45. Hagen AR, Plegaria JS, Sloan N, Ferlez B, Aussignargues C, Burton R, et al. In Vitro Assembly of Diverse Bacterial Microcompartment Shell Architectures. *Nano Lett.* 2018;18(11):7030-7. Epub 2018/10/31. doi: 10.1021/acs.nanolett.8b02991. PubMed PMID: 30346795; PubMed Central PMCID: PMC6309364.
46. Studier FW. Protein production by auto-induction in high density shaking cultures. *Protein Expr Purif.* 2005;41(1):207-34. PubMed PMID: 15915565.
47. Kröner F, Hubbuch J. Systematic generation of buffer systems for pH gradient ion exchange chromatography and their application. *J Chromatogr A.* 2013;1285:78-87. Epub 2013/02/14. doi: 10.1016/j.chroma.2013.02.017. PubMed PMID: 23489486.
48. McCoy AJ, Grosse-Kunstleve RW, Adams PD, Winn MD, Storoni LC, Read RJ. Phaser crystallographic software. *J Appl Crystallogr.* 2007;40(Pt 4):658-74. Epub 2007/07/13. doi: 10.1107/S0021889807021206. PubMed PMID: 19461840; PubMed Central PMCID: PMC2483472.
49. Murshudov GN, Skubák P, Lebedev AA, Pannu NS, Steiner RA, Nicholls RA, et al. REFMAC5 for the refinement of macromolecular crystal structures. *Acta Crystallogr D Biol Crystallogr.* 2011;67(Pt 4):355-67. Epub 2011/03/18. doi: 10.1107/S0907444911001314. PubMed PMID: 21460454; PubMed Central PMCID: PMC3069751.
50. Emsley P, Lohkamp B, Scott WG, Cowtan K. Features and development of Coot. *Acta Crystallogr D Biol Crystallogr.* 2010;66(Pt 4):486-501. Epub 2010/03/24. doi: 10.1107/S0907444910007493. PubMed PMID: 20383002; PubMed Central PMCID: PMC2852313.
51. Winn MD, Ballard CC, Cowtan KD, Dodson EJ, Emsley P, Evans PR, et al. Overview of the CCP4 suite and current developments. *Acta Crystallogr D Biol Crystallogr.* 2011;67(Pt 4):235-42. Epub 2011/03/18. doi: 10.1107/S0907444910045749. PubMed PMID: 21460441; PubMed Central PMCID: PMC3069738.

## Figure legends

**Figure 1 – Hetero-hexamer formation with combined *Syn6803* CcmK paralogs.** Western blot analysis of TALON-purified fractions. After running SDS-PAGE gels, and transferring proteins onto PVDC membranes, detection was performed with a mouse antiFLAG primary antibody followed by a secondary IgG antimouse-alkaline phosphatase fusion. The asterisk before or after the isoform name is to denote N- or C-tagging emplacement, respectively.

**Figure 2 – Hetero-hexamer characterization by native mass spectrometry.** A, Spectra recorded on fractions purified from cells co-expressing CcmK1-His<sub>4</sub> together with CcmK2-FLAG; B, similarly, but from cells co-expressing His<sub>4</sub>-CcmK4 and CcmK3-FLAG. Positive-ion mode native ESI-MS spectra are presented on top panels. These spectra are dominated by signals from multiply charged ions of hexamers. Potential higher order assemblies were observed in combinations with CcmK2. Bottom panels present an example of MS-MS collisional activation data collected on hexamer precursor ions selected from top spectra (indicated with an asterisk). An asymmetric charge partitioning is noticed, hexamers dissociation resulting in two type of monomers and several pentameric species. Monomer

masses permitted to attribute picks to either CcmK1 (red spheres), CcmK2 (green), CcmK3 (orange) or CcmK4 (violet). Species *m/z* values and charges are indicated for major peaks. Cartoons schematically illustrate the stoichiometries of detected protein complexes and subcomplexes. Molecular weights of neutral species estimated from data from different charge states are compiled in Table S1. Please notice that tags were removed prior to spraying by treatments with TEV protease.

**Figure 3 – CcmK hetero-association occurrence upon co-expression of all *Syn6803* CcmK paralogs.** Western blot analysis of TALON-purified fractions, after 10-fold concentration using 10 kDa MWCO filter devices (cases included are those developing bands in purified fractions, as shown in Fig. S4C). Only the identity of the two CcmK at 1<sup>st</sup> (black letters) and 3<sup>rd</sup> cassette (violet) is indicated. The last lane corresponds to a CcmK2 homo-hexamer positive control, a fraction purified from a strain transformed with a K2-His<sub>4</sub>/K2-Strep/K2-FLAG/K2-HA co-expression vector.

Detection on PVDC membranes was effected with either streptactin-AP conjugate (first horizontal lane), or with either mouse antiFLAG (second) or mouse antiHA (third) followed by final revelation with a secondary IgG antimouse-AP fusion. The bottom lane was prepared after continuing the incubation of the membrane used to prepare the second image with a mixture of all three components followed by antimouse-AP and revelation.

**Figure 4 – Sequence and structural considerations on CcmK3 paralogs.** *A*, Sequence alignment of sequences of CcmK from *Syn6803*, *Syn7942* and *Hal7418*. Residues directly participating in inter-monomer contacts in 3D structures of homo-hexamers are shaded in yellow. In red are highlighted notable substitutions present in *Syn6803* CcmK3, which differ considerably in other paralogs and can be shared or not by CcmK3 in other species. The rectangle contoured by discontinuous traces indicate residues that line central CcmK hexamer pores. *B*, *C* Presumed localization on the *Syn6803* CcmK3\_1 modeled structure of some notable residue substitutions, when compared to other CcmK. A ribbon representation is shown with one chain colored blue, neighbor subunits in grey. Panel *B* presents the water-exposed orientation of several hydrophobic side-chains residues that would be localized on the predicted  $\alpha$ -helix-2 of CcmK3 (balls and sticks representation, with carbon atoms in orange, nitrogens in blue, oxygens red and sulfur atoms in yellow). The helix is followed by the stretch comprising S67 to M69, where a residue insertion specific of *Syn6803* CcmK3 occurs. Panel *C* shows the emplacement of other diverging residues, like the Tyr33 or the pore-clogging Glu38-Arg39 residues.

**Figure 5 – Structural analysis of *Syn6803* CcmK hetero-hexamers** - AFM images recorded after adsorption on mica of 70 ng of CcmK3/K4 (panel *A*, *left*) or 180 ng of CcmK1/K2 hetero-hexamers (*B*), in sodium phosphate buffer at pH 6.0. For comparison, 2D arrangement obtained under similar conditions after deposition of 70 ng of CcmK4 homohexamer (*A*, *right*). *C*, plsep-FPLC purification chromatogram after injection of CcmK3/K4 hetero-hexamer sample (two different runs are shown, in black and blue trace). Elution was performed with a linear gradient of a polybuffer solution at pH 5 (gray line). Approximate fraction emplacements are indicated above the chromatogram. Below is shown the 10 to 15 kDa region after migration of different fractions on a SDS-PAGE gel. FLAG-signals detected by WB are shown below. Bands were delayed with regard to Coomassie-stained bands. Pooled fractions 8 and 9 were selected for crystallographic experiments. *D*, Crystallization of that pooled fraction permitted to solve structures that revealed the sole presence of CcmK4. Shown is the resulting CcmK4 crystal packing, revealing a molecular layer with hexamers arranged following a

uniform orientation (shown with CcmK4 convex side facing up). Interhexamer spacing is 7,1 nm. A ribbon view is presented, with elements colored in accordance to secondary structure elements.

**Figure 6 – Stability of Syn6803 CcmK hetero-hexamers** - *A*, Subunit exchange investigated by western blots. *Top*, FLAG signals recovered bound to TALON beads after reacting with purified His<sub>4</sub>-K4/K3-FLAG (7 μM monomer concentration) that had been pre-incubated overnight, at pH ranging between 5 and 9, in the absence (top lane) or presence of 14% PEG 3350 (bottom). The first lane corresponds to a sample at pH 7 that was maintained at 4°C throughout the overnight incubation. The bottom panel presents FLAG signals detected for indicated homo- and hetero-hexamers combining His<sub>4</sub>- and FLAG-tagged subunits (2 μM final monomer concentration, indicated by black or violet letters, respectively) that were incubated overnight at room temperature and pH 8 in the absence or in the presence of untagged K4 or K1 homo-hexamers (6 μM monomer). *B*, Thermal denaturation monitored by DSF (*top*) and DLS (*bottom*). In DSF experiments, the proteins were incubated with the Sypro dye and the fluorescence of the probe was monitored as temperature was increased. For DLS assays, changes of the intensity of scattered light of hexamer solutions with temperature were recorded. DSF and DLS data were normalized before analysis. For each case, a single curve representative of results obtained in several replicates is shown.

**Figure 7 – Hetero-hexamer formation between Syn7942 CcmK3 and CcmK4.** Western blot analysis of fractions remaining soluble after cellular lysis and centrifugation (top lane) and material purified on TALON resins (bottom). Left panel correspond to samples prepared from cellular cultures that were induced in IPTG (200 μM), whereas data on the right correspond to samples produced under auto-induction conditions. Detection on PVDC membranes was performed with a mouse antiFLAG primary antibody followed by a secondary IgG antimouse-alkaline phosphatase fusion.

Figure 1

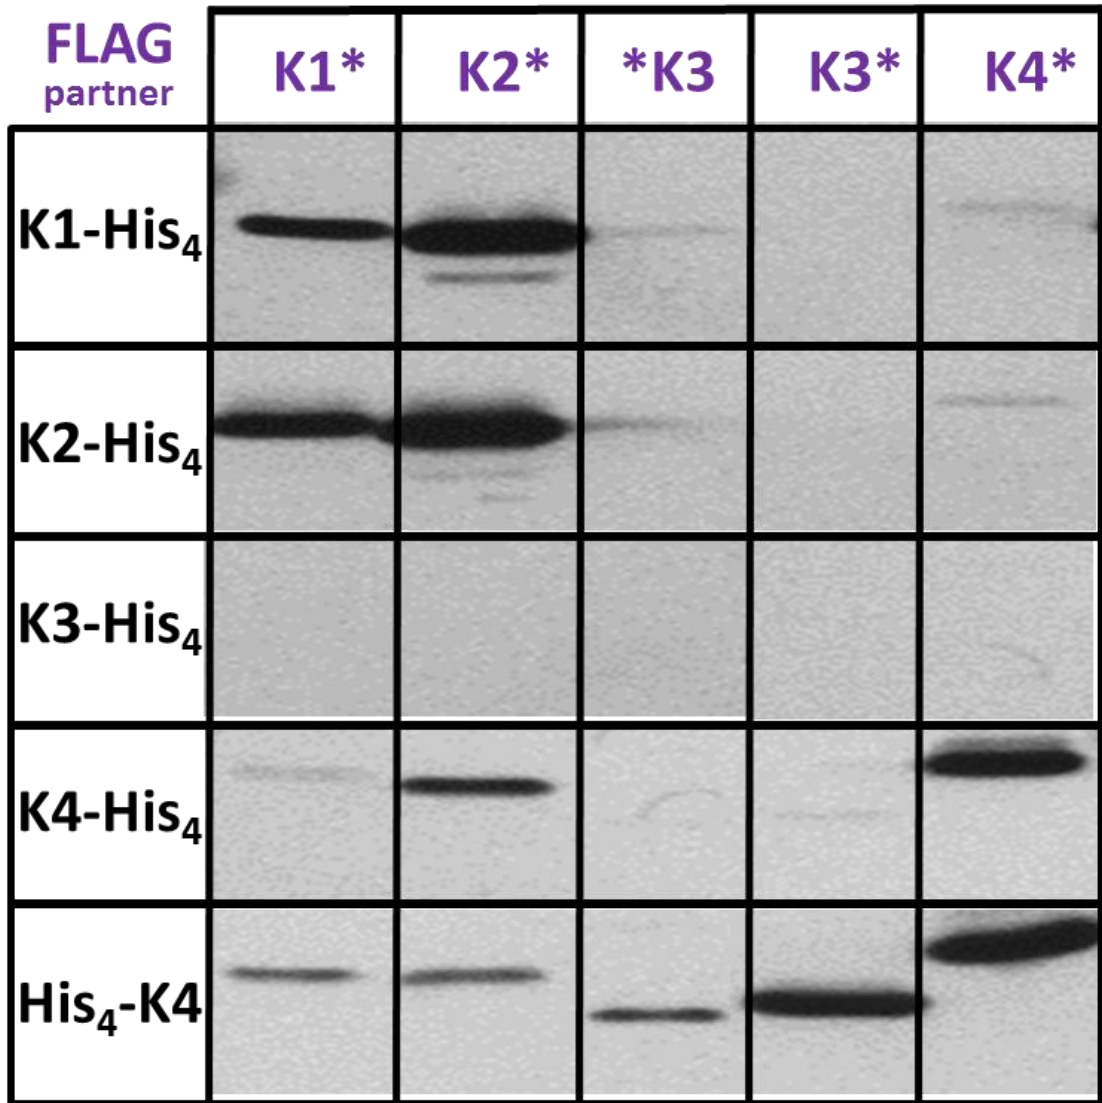

# Figure 2

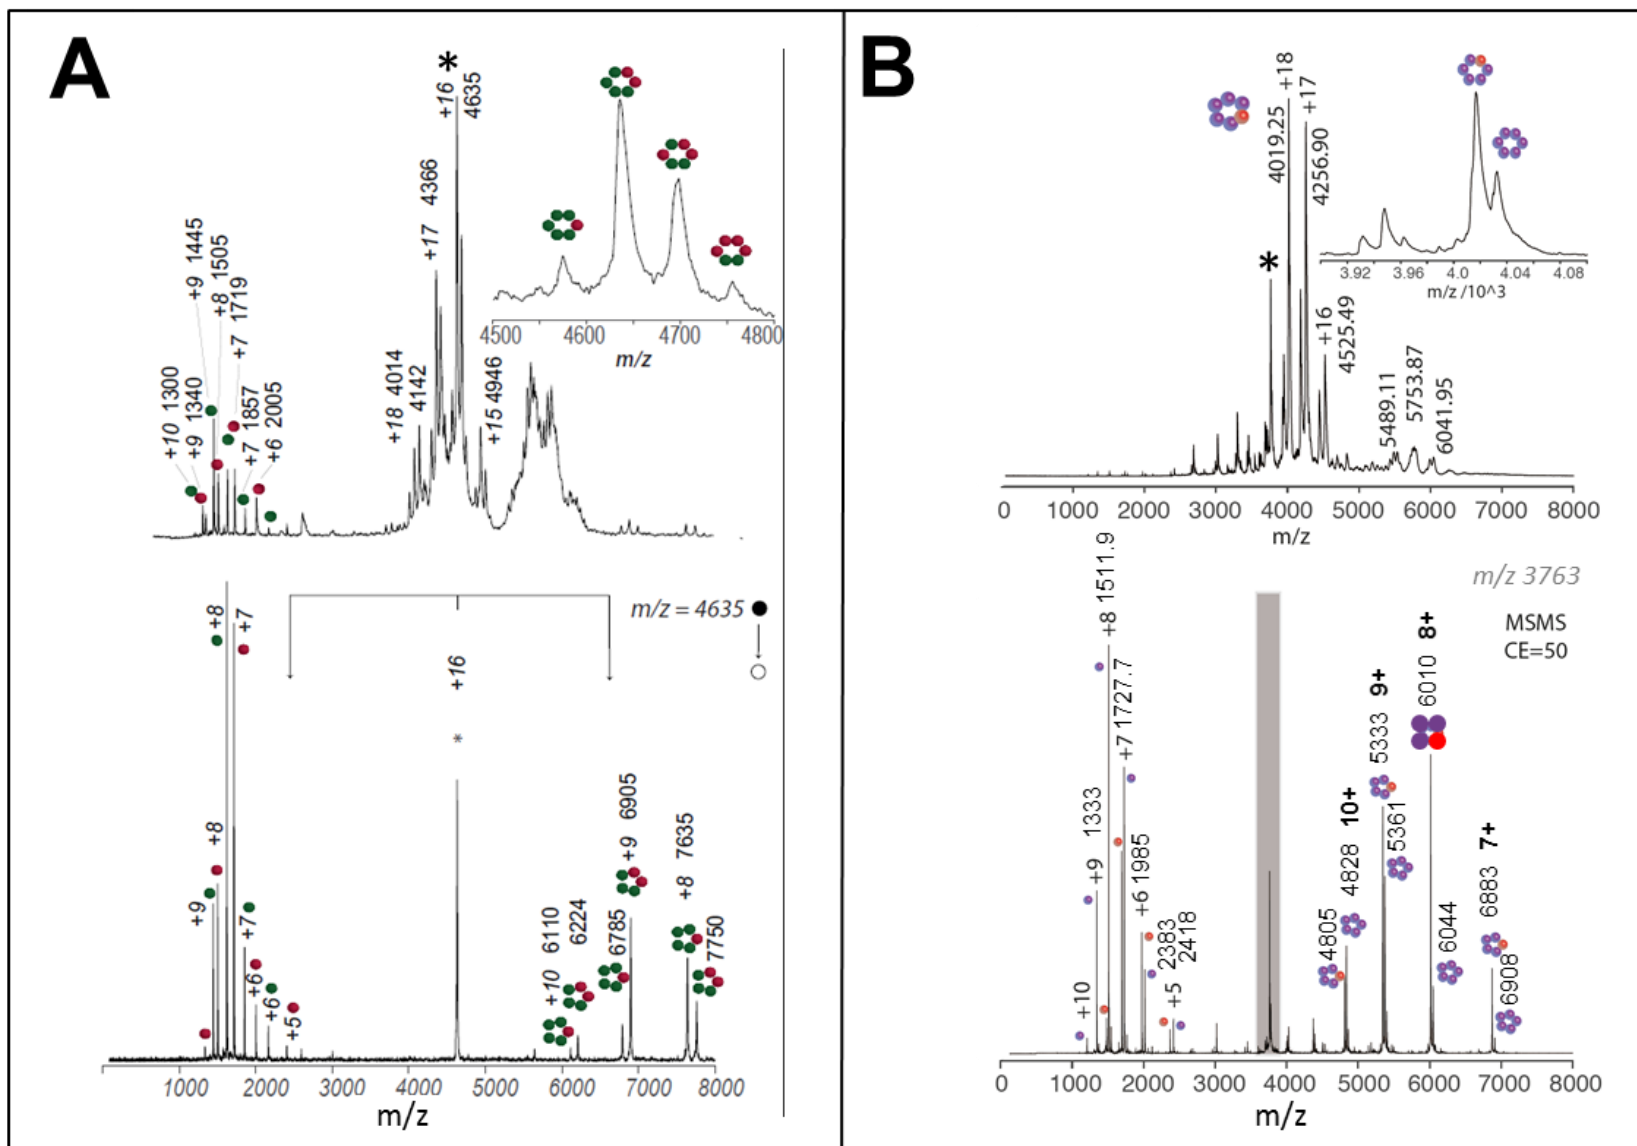

## Figure 3

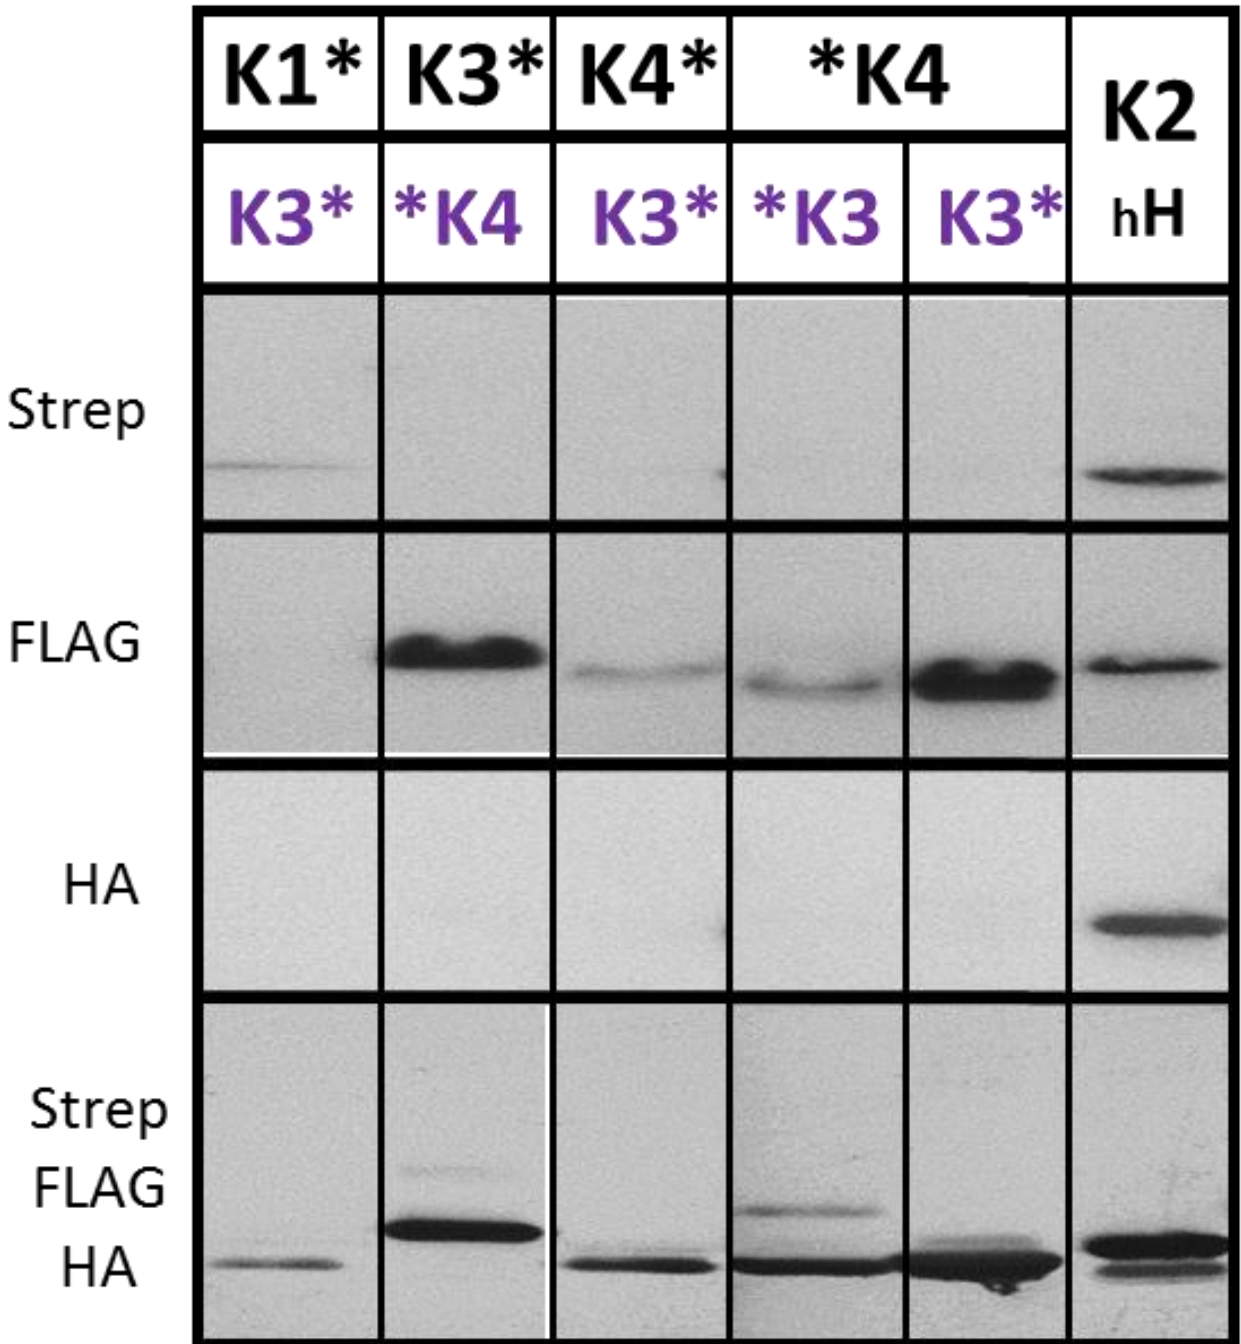

## Figure 4

**A**

|         |                                                                                                                                   |     |
|---------|-----------------------------------------------------------------------------------------------------------------------------------|-----|
| K1_6803 | --MSIAVGMIETLGFPVVEAADSMVKAARVTLVGYEKIGSGRVTVIVRGDVSEVQASVT                                                                       | 58  |
| K1_7418 | --MAVAVGMIETLGFPVVEAADAMVKAARVTLVGYEKIGTGRVTVIVRGDVSEVQASVS                                                                       | 58  |
| K2_6083 | --MSIAVGMIETRGFPVVEAADSMVKAARVTLVGYEKIGSGRVTVIVRGDVSEVQASVS                                                                       | 58  |
| K2_7942 | --MPIAVGMIETLGFPVVEAADAMVKAARVTLVGYEKIGSGRVTVIVRGDVSEVQASVS                                                                       | 58  |
| K2_7418 | --MPIAVGMIETLGFPVVEAADAMVKAARVTLVGYEKIGTGRVTVIVRGDVSEVQASVS                                                                       | 58  |
| K3_6803 | --MPQAVGVIQTLGFPSVLAADAMLKGRVTLVYDIAERGNFVVAIRGVPSEVNL <sup>L</sup> SMK                                                           | 58  |
| K3_7942 | --MPIAVGTIQLGFPPIIAADAMVKAARVTITQYGLAESAQFFVSVRGPVSEVETAVE                                                                        | 58  |
| K3_7418 | --MPVAVGVIQTDGFPAVLAADAMVKAASVTLVSFDKAE <sup>R</sup> QFFVAVRGPVSEVER <sup>S</sup> SME                                             | 58  |
| K4_6803 | MSAQSAVGS <sup>I</sup> ETIGFPGI <sup>L</sup> AAADAMVKAGRITIVGY <sup>I</sup> RAGS <sup>A</sup> RFTLNIRGDVQEVKTAMA                  | 60  |
| K4_7942 | -MSQQAIGSLET <sup>K</sup> GFPP <sup>I</sup> LAAADAMVKAGRITIVSY <sup>M</sup> RAGS <sup>A</sup> RFVAVNIRGDVSEVKTAMD                 | 59  |
| K4_7418 | -MSLDAVGSLET <sup>K</sup> GFPGV <sup>L</sup> AAADAMVKTGRVTLVG <sup>Y</sup> IRAGS <sup>A</sup> RFTIIIRGDVSEVKTAMD                  | 59  |
|         | 1.....10.....20.....30.....40.....50.....58                                                                                       |     |
| <hr/>   |                                                                                                                                   |     |
| K1_6803 | AGIENIRRV-NGGEVLSNHI <sup>I</sup> ARPHENLEYVLP <sup>I</sup> RYTEAVEQFREIVNPSI-IRR----                                             | 111 |
| K1_7418 | AGTESVKRV-NGGQVLSTHI <sup>I</sup> ARPHENLEYVLP <sup>I</sup> RYTEEVEQFREGVGT <sup>R</sup> PNITRQ---                                | 113 |
| K2_6083 | AGIEAANRV-NGGEVLSTHI <sup>I</sup> ARPHENLEYVLP <sup>I</sup> RYTEEEVEQFR <sup>T</sup> Y-----                                       | 103 |
| K2_7942 | AGLDSAKRV-AGGEVLSHHI <sup>I</sup> ARPHENLEYVLP <sup>I</sup> RYTEAVEQFR <sup>M</sup> -----                                         | 102 |
| K2_7418 | AGVDSANRV-NGGEVLSTHI <sup>I</sup> ARPHENLEYVLP <sup>I</sup> RYTEAVEQFR <sup>R</sup> -----                                         | 101 |
| K3_6803 | <sup>M</sup> GLAAVNES <sup>V</sup> MGGEIVSHYI <sup>V</sup> PN <sup>P</sup> ENV <sup>L</sup> AVLPVEYTEKVARFRT-----                 | 103 |
| K3_7942 | AGLKAVAET-EGAE <sup>L</sup> IN <sup>I</sup> YI <sup>V</sup> IPN <sup>P</sup> QENVETVMPIDFTA <sup>E</sup> SEPF <sup>R</sup> S----- | 102 |
| K3_7418 | AGIAAAEET-YNGTVITHYMI <sup>P</sup> NP <sup>P</sup> DNVETVMP <sup>I</sup> AYSDEVEPF <sup>R</sup> V-----                            | 102 |
| K4_6803 | AGIDAINRT-EGADV <sup>K</sup> TW <sup>V</sup> IIPRPHENVVAVLPIDFSPEVEPF <sup>R</sup> EAAEGLNRR-----                                 | 112 |
| K4_7942 | AGIEAAKNT-PGGTLET <sup>W</sup> V <sup>I</sup> IIPRPHENVEAVFPIGFGPEVEQYRLSAE <sup>G</sup> TGSGRR----                               | 113 |
| K4_7418 | AGIHAVDKA-YGAALET <sup>W</sup> V <sup>I</sup> IIPRPHENVECVLP <sup>I</sup> AYNENVERF <sup>R</sup> ESTERPLIGSSQ <sup>N</sup> RS     | 117 |
|         | 60.....70.....80.....90.....100.....110.....                                                                                      |     |

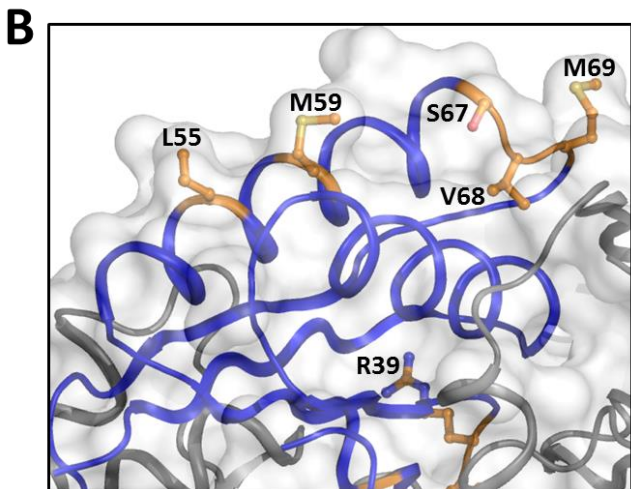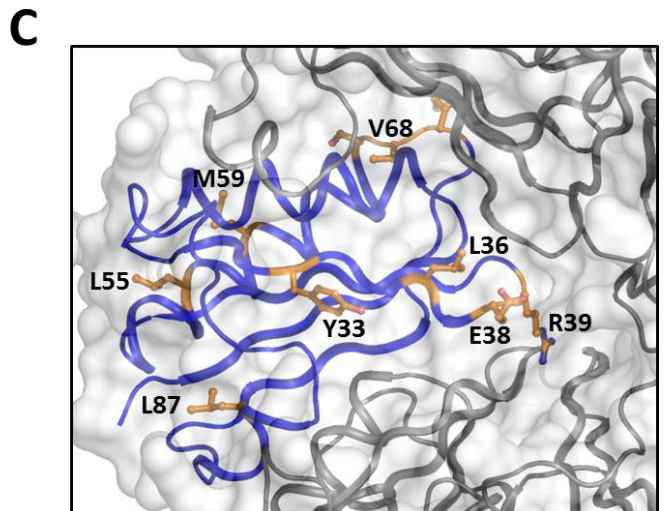





**Figure 6.**

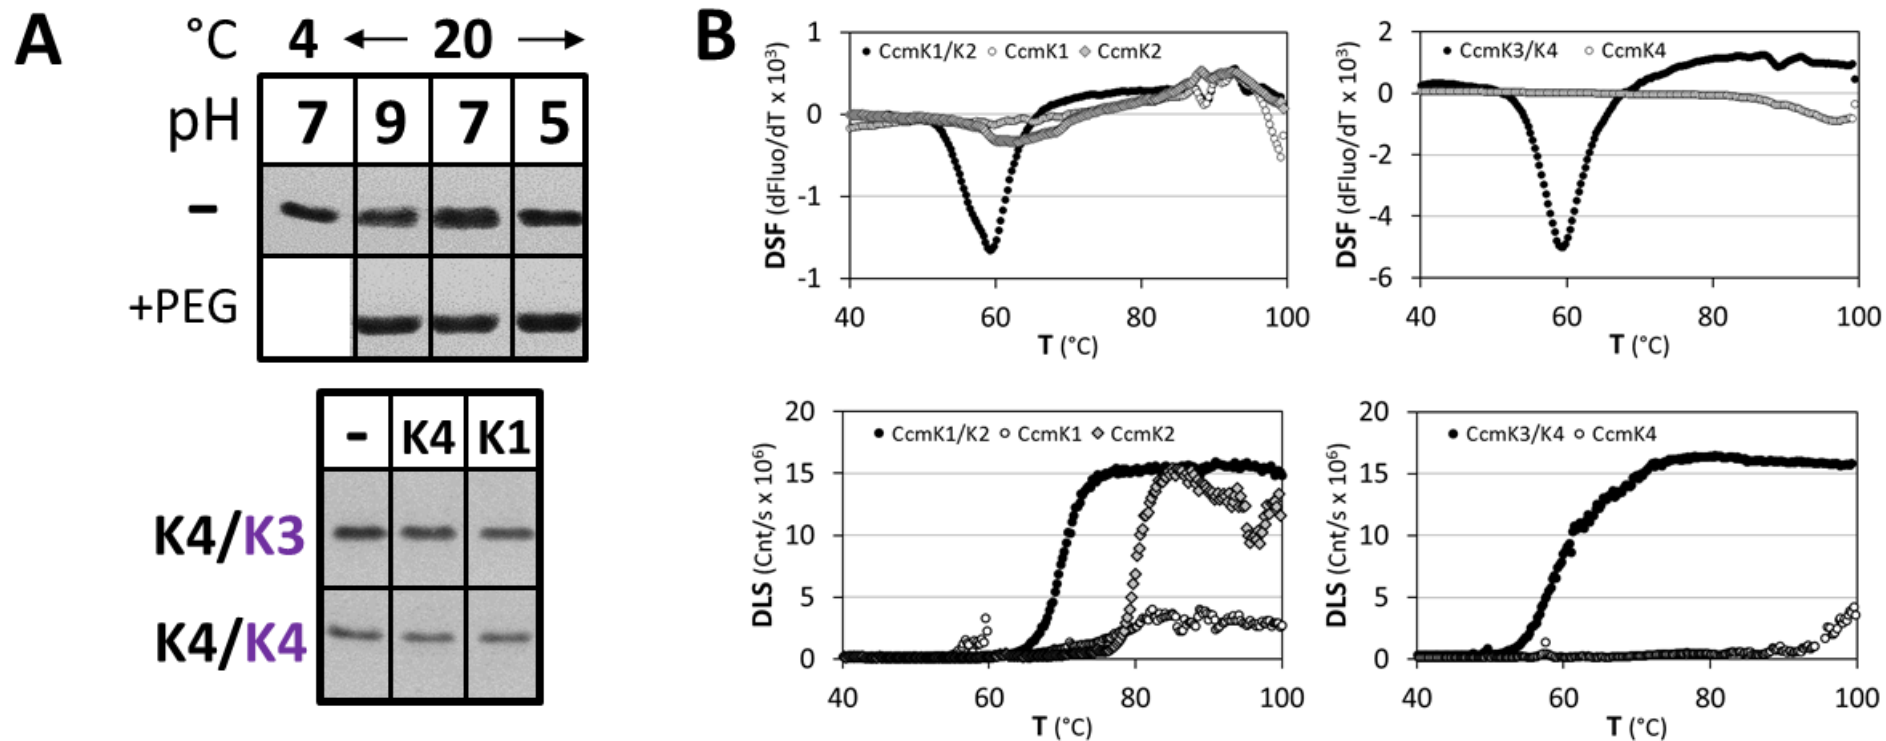

Figure 7

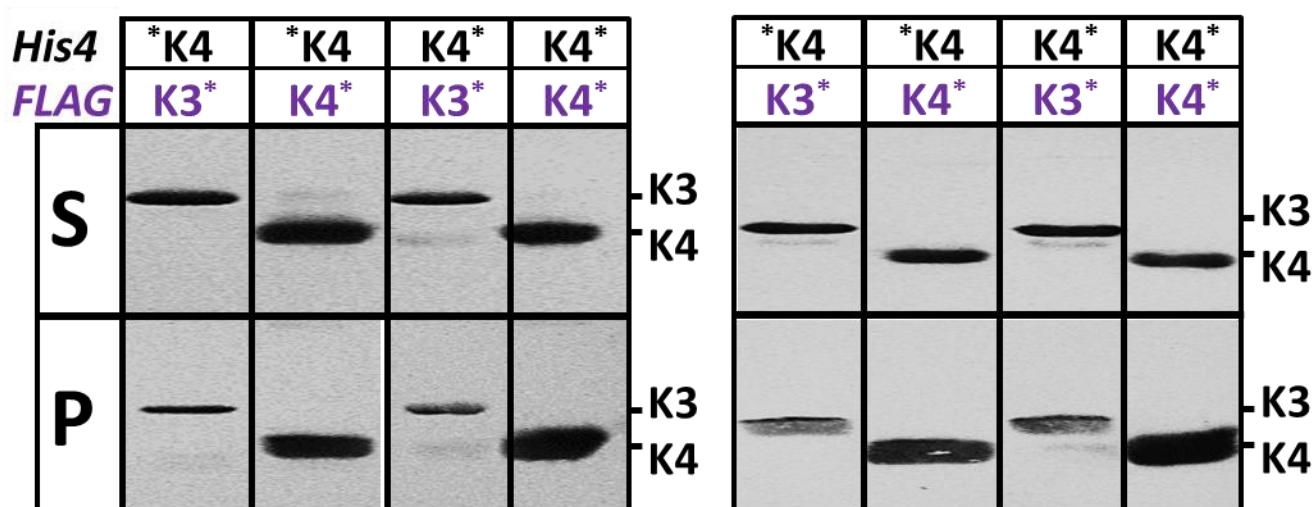

Source: https://biorxiv.org/content/biorxiv/early/2019/08/09/730861.full-text.pdf
